# Supplementary material for: Mechanochemical indium(0)-mediated Barbier allylation of carbonyl compounds: unexpected immiscible water additive effect for hydrophobic reagents
Source: Royal Society of Chemistry journal article supplement (doi:10.1039/d4mr00005f), 2024-01-01
Supplement: d4mr00005f1.pdf [file d4mr00005f1.pdf]

## Supplementary Information

# Mechanochemical Indium(0)-mediated Barbier allylation of Carbonyl Compounds: Unexpected Immiscible Water Additive Effect for Hydrophobic Reagents

Nuri Kim,<sup>a†</sup> Eun Sul Go,<sup>a†</sup> Jeung Gon Kim<sup>\*ab</sup>

<sup>a</sup>Department of Chemistry and Research Institute of Physics and Chemistry Jeonbuk National University, Jeonju, 54896, Republic of Korea

<sup>b</sup>Department of JBNU-KIST Industry-Academia Convergence Research, Jeonbuk National University, Jeonju 54896, Republic of Korea

## 1. General Considerations

### Materials

All reagents were purchased from Alfa Aesar, Aldrich, or TCI and used without further purification. The ball-milling experiments were performed using a Retsch Mixer Mill MM 400 instrument with a stainless, zirconia, or Teflon vessel and stainless-steel balls with diameters of 7 mm or zirconia balls with diameters of 8 mm.

### Measurements

The <sup>1</sup>H and <sup>13</sup>C NMR spectra were measured by a Bruker AVANCE III HD-400 MHz Fourier transform NMR spectrometer at the Future Energy Convergence Core Center (FECC). Infrared spectra were recorded on an ABB MB3000 Fourier-transform infrared (FT-IR) spectrometer equipped with an attenuated total reflectance module.

## 2. Experimental

### General Procedure A for Reactions of Allylation

A 10 mL Teflon milling jar was filled with the carbonyl compound (0.50 mmol, 1.0 equiv.), indium powder (325 mesh; 1.0 mmol, 116 mg, 2.0 equiv.), allyl bromide (0.75 mmol, 65  $\mu$ L, 1.5 equiv.), deionized water (40  $\mu$ L), and three stainless steel balls (7 mm diameter) under an air atmosphere. And the mixture was milled at 30 Hz for 5 min. After the reaction was finished, the crude mixture transferred with chloroform (10 mL), quenched with 1 M HCl (10 mL), and stirred for 30 min until the organic layer becomes transparent. The organic layer was separated and dried over MgSO<sub>4</sub>, filtered, and concentrated under reduced pressure. The crude material was then purified by silica gel flash chromatography.

### Scale-up experiment

A 25 mL Teflon milling jar was filled with the 4-phenylbenzaldehyde (5.3 mmol, 1.0 g, 1.0 equiv.), indium powder (325 mesh; 1.1 mmol, 1.2 g, 2.0 equiv.), allyl bromide (8.0 mmol, 712  $\mu$ L, 1.5 equiv.), deionized water (0.20 mL), and three stainless steel balls (7 mm diameter) under an air atmosphere. And the mixture was milled at 30 Hz for 5 minutes and rested for 5 minutes. Repeat this process six times. After the reaction was finished, the crude mixture transferred with chloroform (100 mL), quenched with 1 M HCl (100 mL), and stirred for 5 h until the organic layer becomes transparent. The organic layer was separated and dried over MgSO<sub>4</sub>, filtered, and concentrated under reduced pressure. The crude material was then purified by silica gel flash chromatography.

## General Procedure B for Reactions of Propargylation

A 10 mL Teflon milling jar was filled with the aldehyde (0.50 mmol, 1.0 equiv.), indium powder (325 mesh; 1.0 mmol, 116 mg, 2.0 equiv.), propargyl bromide (0.75 mmol, 61  $\mu$ L, 1.5 equiv.), deionized water (40  $\mu$ L), and three stainless steel balls (7 mm diameter) under an air atmosphere. And the mixture was milled at 30 Hz for 5 min. After the reaction was finished, the crude mixture transferred with chloroform (10 mL), quenched with 1 M HCl (10 mL), and stirred for 30 min until the organic layer becomes transparent. The organic layer was separated and dried over  $MgSO_4$ , filtered, and concentrated under reduced pressure. The crude material was then purified by silica gel flash chromatography.

## General Procedure C for Reactions of Crotylation

A 10 mL Teflon milling jar was filled with the aldehyde (0.50 mmol, 1.0 equiv.), indium powder (325 mesh; 1.0 mmol, 116 mg, 2.0 equiv.), crotyl bromide (0.75 mmol, 77  $\mu$ L, 1.5 equiv.), deionized water (40  $\mu$ L), and three stainless steel balls (7 mm diameter) under an air atmosphere. And the mixture was milled at 30 Hz for 30 min. After the reaction was finished, the crude mixture transferred with chloroform (10 mL), quenched with 1 M HCl (10 mL), and stirred for 30 min until the organic layer becomes transparent. The organic layer was separated and dried over  $MgSO_4$ , filtered, and concentrated under reduced pressure. The crude material was then purified by silica gel flash chromatography.

**Table S1.** Scope of carbonyl compounds.

| Entry | Product                               | NMR Conv. (%)  | NMR Yield. (%) | Isolated Yield   |
|-------|---------------------------------------|----------------|----------------|------------------|
| 2a-1  | 1-([1,1'-biphenyl]-4-yl)but-3-en-1-ol | >99            | 95             | 96.3mg (86%)     |
| 2a-2  |                                       | >99            | 97             | 102 mg (91%)     |
| 2b-1  | 1-Phenyl-3-buten-1-ol                 | >99            | 99             | 70.7 mg (95.4 %) |
| 2b-2  |                                       | >99            | 99             | 69.8 mg (94.2 %) |
| 2c-1  | 1-(4-Chlorophenyl)-3-buten-1-ol       | >99            | 98             | 86.2 mg (94.3 %) |
| 2c-2  |                                       | >99            | 99             | 87.9 mg (96.2 %) |
| 2d-1  | 1-(4-Methoxyphenyl)-3-buten-1-ol      | 99             | 80             | 69.6 mg (78%)    |
| 2d-2  |                                       | 98             | 79             | 64.0 mg (72%)    |
| 2e-1  | 1-(4-Nitrophenyl)-3-buten-1-ol        | 99             | 0              | -                |
| 2e-2  |                                       | 99             | 0              | -                |
| 2f-1  | 1-(pyren-2-yl)but-3-en-1-ol           | 100            | 97             | 109.6 mg (81%)   |
| 2f-2  |                                       | 100            | 99             | 136 mg (100%)    |
| 2g-1  | 1-(Anthracen-9-yl)but-3-en-1-ol       | >99            | 99             | 118 mg (95 %)    |
| 2g-2  |                                       | 99             | 99             | 120 mg (96.8 %)  |
| 2h-1  | 1-Phenyl-1,5-hexadien-3-ol            | >99            | 85             | 67.0 mg (77%)    |
| 2h-2  |                                       | >99            | 99             | 78.2 mg (89%)    |
| 2i-1  | 1-(Cyclohexen-1-yl)-3-buten-1-ol      | irreproducible | irreproducible | 27.0 mg (35%)    |
| 2i-2  |                                       | irreproducible | irreproducible | 12.2 mg (16%)    |
| 2i-3  |                                       | irreproducible | irreproducible | 64.2 mg (84%)    |
| 2i-4  |                                       | irreproducible | irreproducible | 37.6 mg (49%)    |
| 2j-1  | 1-Phenyl-5-hexen-3-ol                 | >99            | 98             | 78.9 mg (90%)    |
| 2j-2  |                                       | >99            | 95             | 76.4 mg (87%)    |
| 2k-1  | 1-Cyclohexyl-3-buten-1-ol             | 99             | 99             | 57.6 mg (74.6 %) |
| 2k-2  |                                       | 99             | 98             | 60.3 mg (78.2 %) |
| 2l-1  | Dodec-1-en-4-ol                       | 96             | 95             | 71.6 mg (77.7 %) |
| 2l-2  |                                       | 96             | 96             | 77.0 mg (83.5 %) |
| 2m-1  | 1,1'-(1,4-Phenylene)dibut-3-en-1-ol   | >99            | 69             | 37.0 mg (67.7 %) |
| 2m-2  |                                       | >99            | 65             | 33.3 mg (61 %)   |
| 2n-1  | 2-Phenylpent-4-en-2-ol                | 91             | 85             | 67.3 mg (82.9 %) |
| 2n-2  |                                       | 88             | 82             | 61.9 mg (77.5 %) |

**Table S2.** Scale-up experiment

| Entry | Product                               | NMR Conv. (%) | NMR Yield. (%) | Isolated Yield |
|-------|---------------------------------------|---------------|----------------|----------------|
| 2a-3  | 1-([1,1'-biphenyl]-4-yl)but-3-en-1-ol | >99           | 94             | 1.12 g (91.1%) |
| 2a-4  |                                       | >99           | 90             | 1.09 g (88.7%) |

**Table S3.** Mechanochemical indium propargylation

| Entry    | Product                                    | NMR Conv. (%) | NMR Yield. (%) | Propargyl(3) : Allenyl(4) (%) | Isolated Yield   |
|----------|--------------------------------------------|---------------|----------------|-------------------------------|------------------|
| 3a(4a)-1 | 1-([1,1'-Biphenyl]-4-yl)but-3-yn-1-ol      | 77            | 77             | 81 : 19                       | 78.7 mg (70.8 %) |
| 3a(4a)-2 | 1-([1,1'-biphenyl]-4-yl)buta-2,3-dien-1-ol | 77            | 76             | 81 : 19                       | 75.1 mg (67.6 %) |
| 3b(4b)-1 | 1-(4-Chloro-phenyl)-but-3-yn-1-ol          | 87            | 87             | 79 : 21                       | 71.7 mg (79.4 %) |
| 3b(4b)-2 | 1-(4-(chlorophenyl)buta-2,3-dien-1-ol      | 88            | 86             | 82 : 18                       | 74 mg (81.9 %)   |
| 3c(4c)-1 | 1-Phenylhex-5-yn-3-ol                      | 91            | 91             | 81 : 19                       | 68.4 mg (78.5 %) |
| 3c(4c)-2 | 1-Phenylhexa-4,5-dien-3-ol                 | 92            | 91             | 80 : 20                       | 71.5 mg (82 %)   |

**Table S4.** Mechanochemical indium crotylation

| Entry | Product                                        | NMR Conv. (%) | NMR Yield. (%) | Syn(5) : anti(5') (%) | Isolated Yield |
|-------|------------------------------------------------|---------------|----------------|-----------------------|----------------|
| 5a-1  | 1-([1,1'-biphenyl]-4-yl)-2-methylbut-3-en-1-ol | >99           | 91             | 54 : 46               | 103 mg (87%)   |
| 5a-2  |                                                | >99           | 99             | 54 : 46               | 115.9 mg (97%) |
| 5b-1  | 1-(4-Chlorophenyl)-2-methylbut-3-en-1-ol       | 99            | 96             | 53 : 47               | 73.1 mg (74%)  |
| 5b-2  |                                                | >99           | 94             | 51 : 49               | 81.6 mg (83%)  |
| 5c-1  | 4-Methyl-1-phenyl-hex-5-en-3-ol                | 100           | 90             | 50 : 50               | 84.6 mg (89%)  |
| 5c-2  |                                                | >99           | 95             | 52 : 48               | 85.5 mg (90%)  |

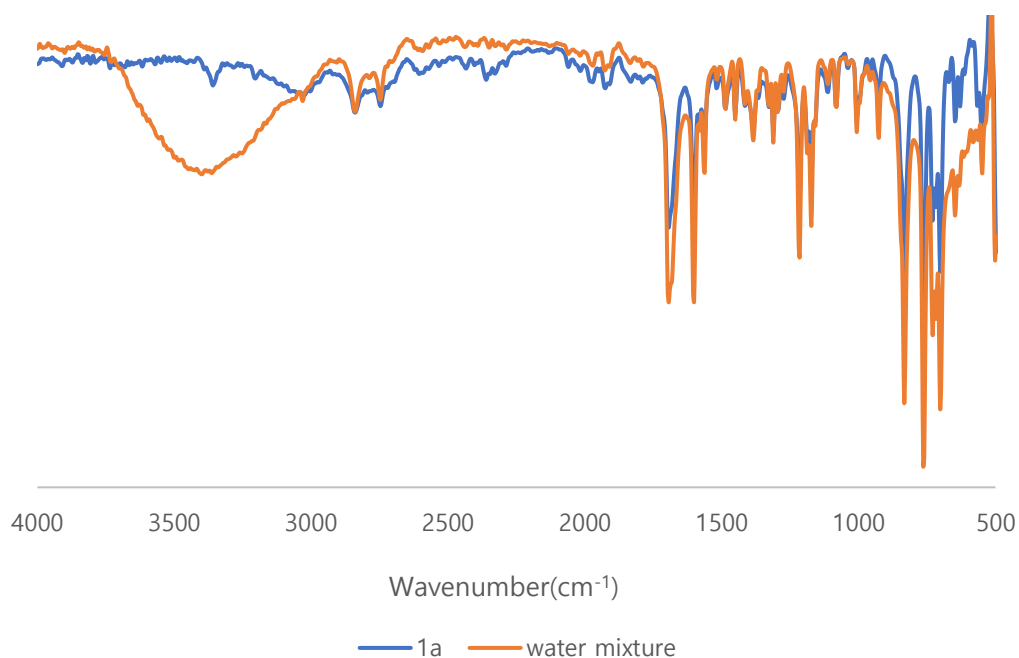**Figure S1.** Infrared spectra for aldehyde **1a** and water mixture ball-milling

### 3. $^1\text{H}$ & $^{13}\text{C}$ NMR of obtained products

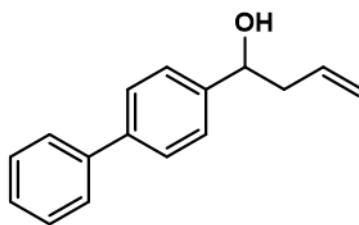

2a

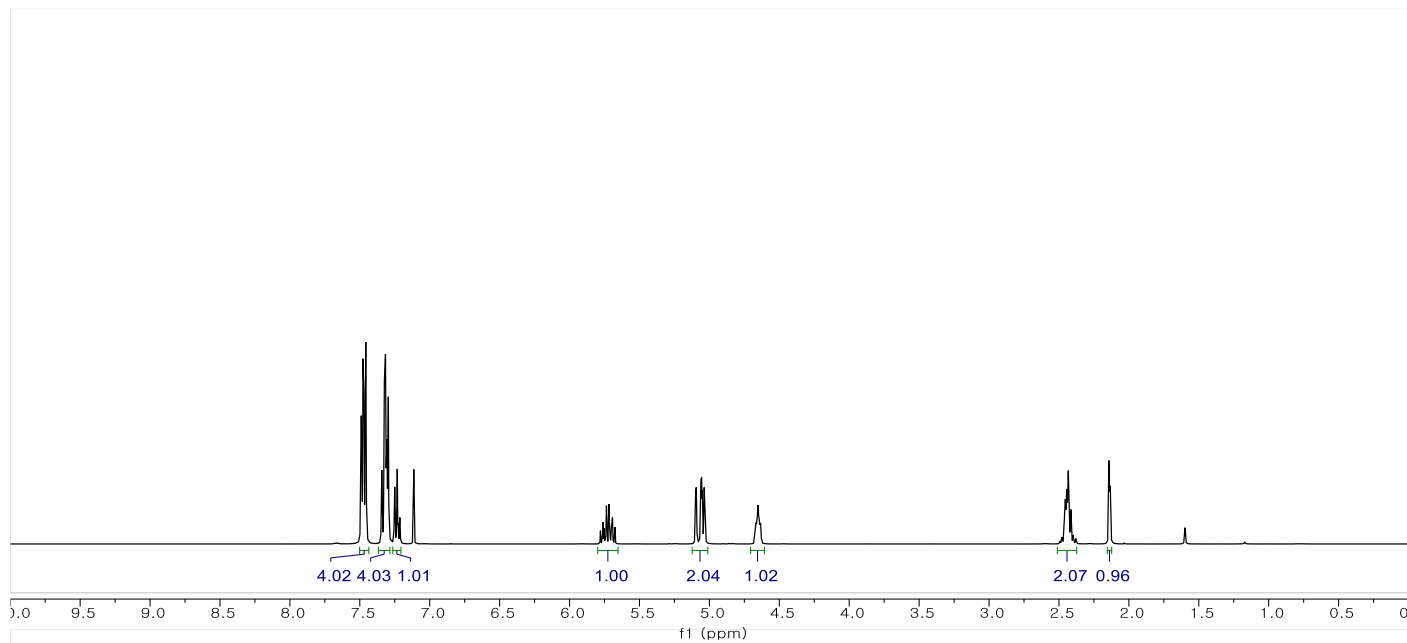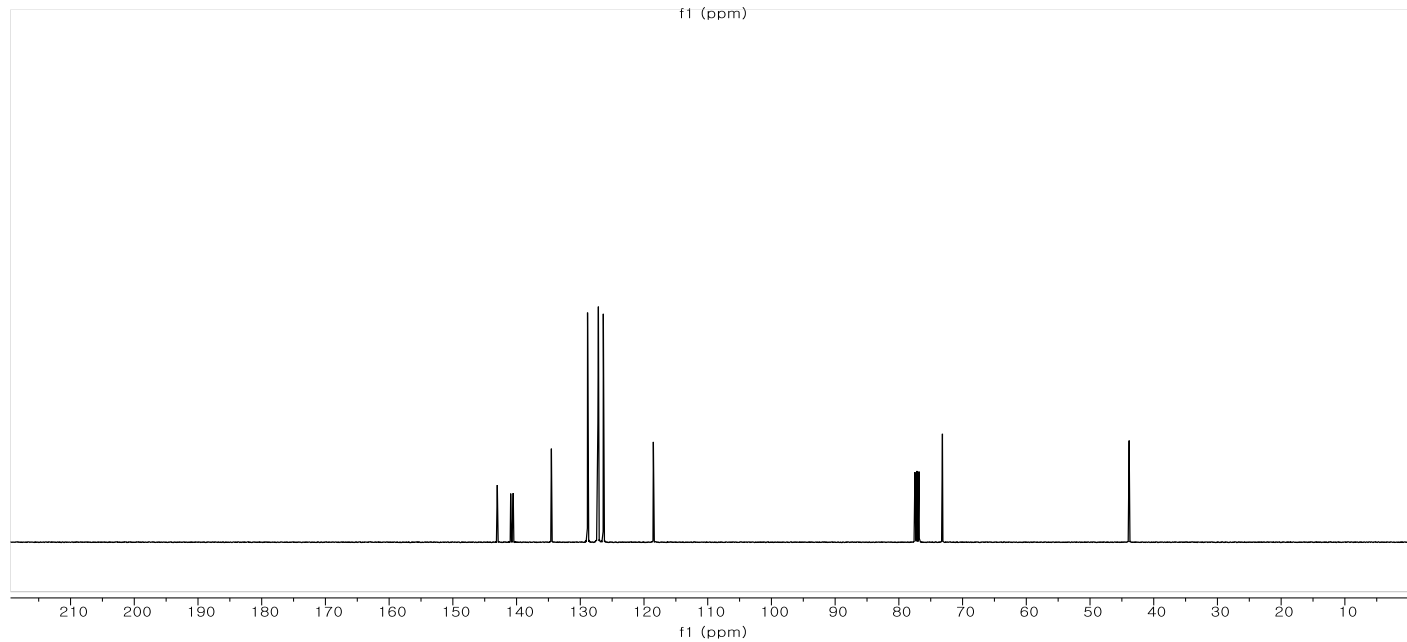

$^1\text{H}$  NMR (400 MHz, chloroform-*d*)  $\delta$  7.50 – 7.44 (m, 4H), 7.37 – 7.28 (m, 4H), 7.26 – 7.21 (m, 1H), 5.73 (m,  $J = 17.2, 10.2, 7.1$  Hz, 1H), 5.12 – 5.01 (m, 2H), 4.65 (m,  $J = 8.0, 5.3, 2.8$  Hz, 1H), 2.51 – 2.37 (m, 2H), 2.14 (d,  $J = 2.9$  Hz, 1H).

$^{13}\text{C}$  NMR (101 MHz, Chloroform-*d*)  $\delta$  143.0, 140.9, 140.5, 134.5, 128.9, 127.4, 127.2, 127.2, 126.4, 118.5, 73.2, 43.9.

Following the general procedure A. Spectra were matched to a previous report.<sup>1</sup>

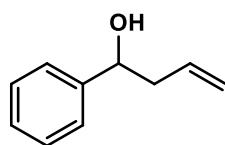

2b

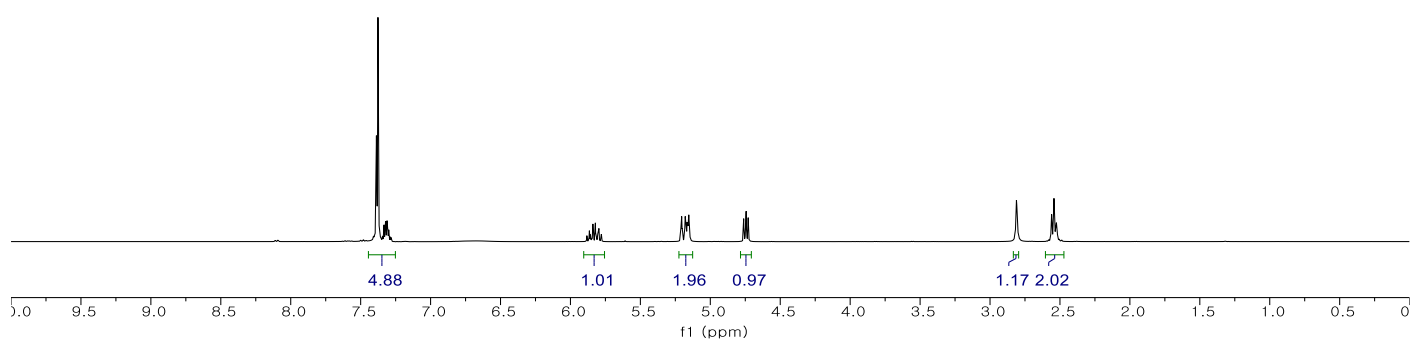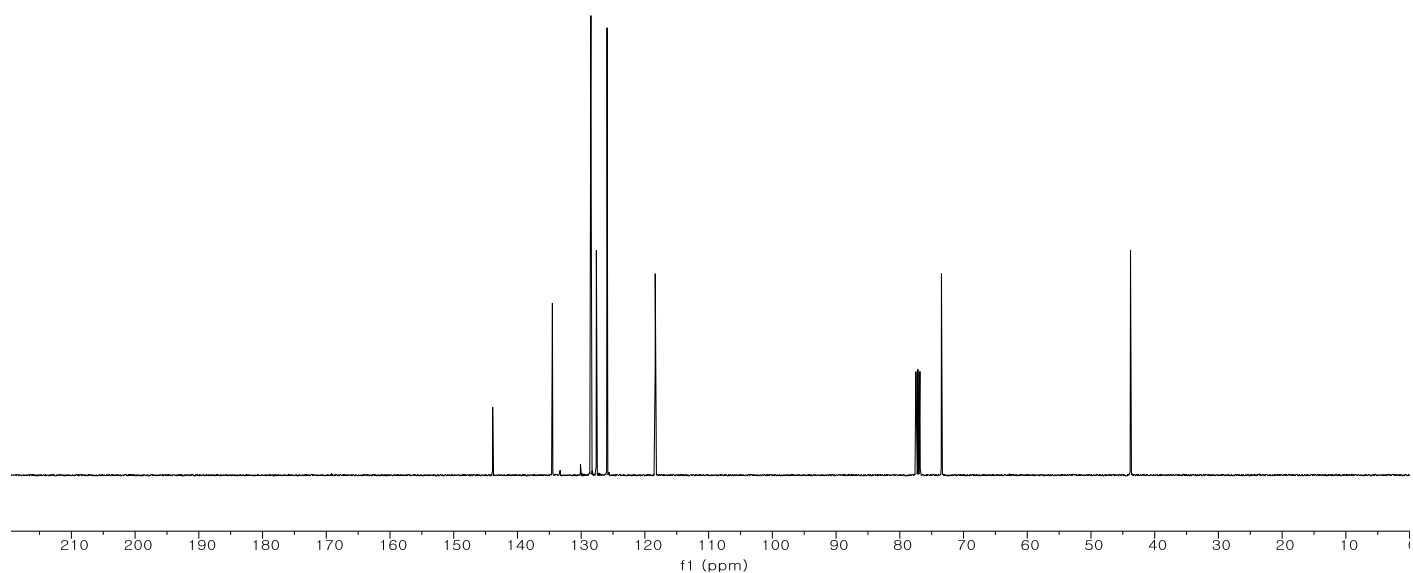

$^1\text{H}$  NMR (400 MHz, Chloroform-d)  $\delta$  7.40 – 7.13 (m, 5H), 5.71 (m,  $J = 17.2, 10.2, 7.1$  Hz, 1H), 5.11 – 5.01 (m, 2H), 4.63 (dd,  $J = 7.2, 5.8$  Hz, 1H), 2.69 (s, 1H), 2.43 (m,  $J = 7.2, 6.1, 1.2$  Hz, 2H).

$^{13}\text{C}$  NMR (101 MHz, Chloroform-d)  $\delta$  143.9, 134.5, 128.5, 127.6, 125.9, 118.4, 73.5, 43.8.

Following the general procedure A. Spectra were matched to a previous report.<sup>2</sup>

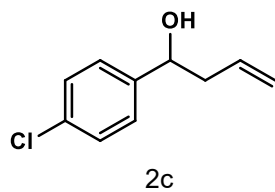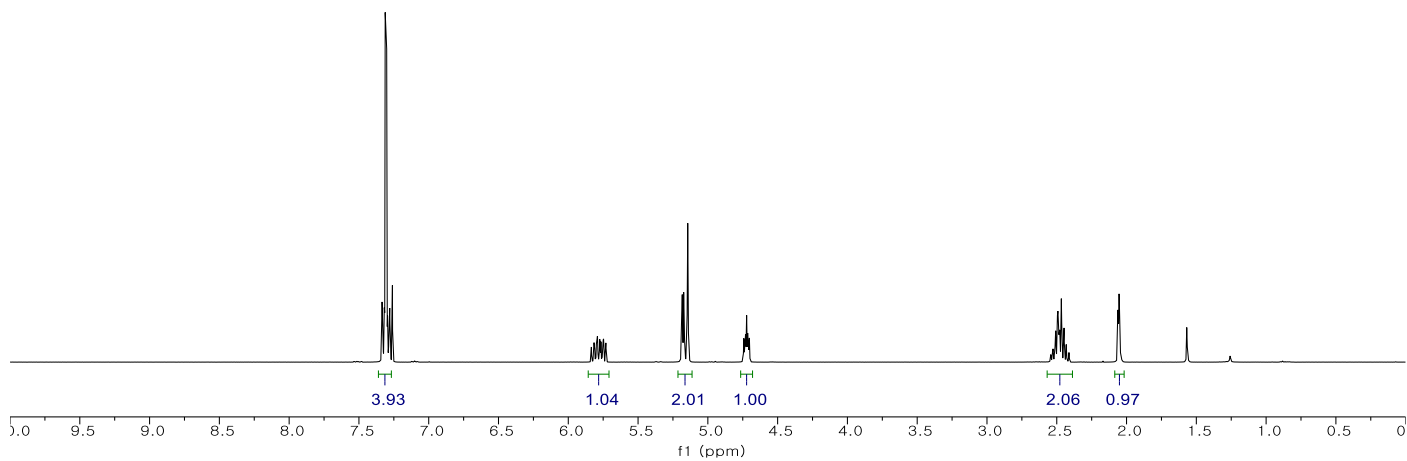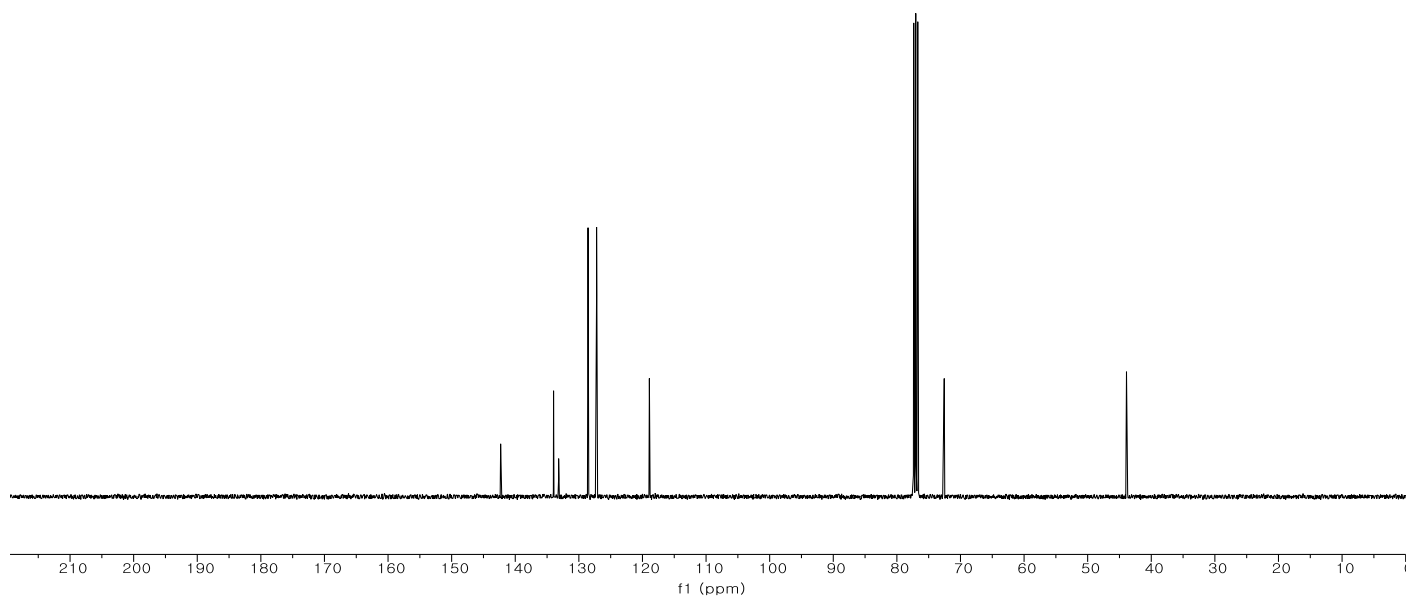

$^1\text{H}$  NMR (400 MHz, Chloroform-d)  $\delta$  7.34 – 7.27 (m, 4H), 5.86 – 5.71 (m, 1H), 5.21 – 5.11 (m, 2H), 4.72 (m, J = 8.0, 5.0, 3.2 Hz, 1H), 2.57 – 2.39 (m, 2H), 2.05 (m, J = 2.7, 1.3 Hz, 1H).

$^{13}\text{C}$  NMR (101 MHz, Chloroform-d)  $\delta$  142.4, 134.1, 133.3, 128.7, 127.3, 119.1, 72.7, 44.0.

Following the general procedure A. Spectra were matched to a previous report.<sup>2</sup>

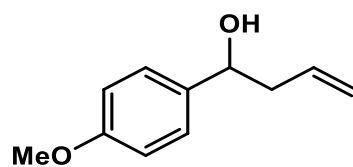

2d

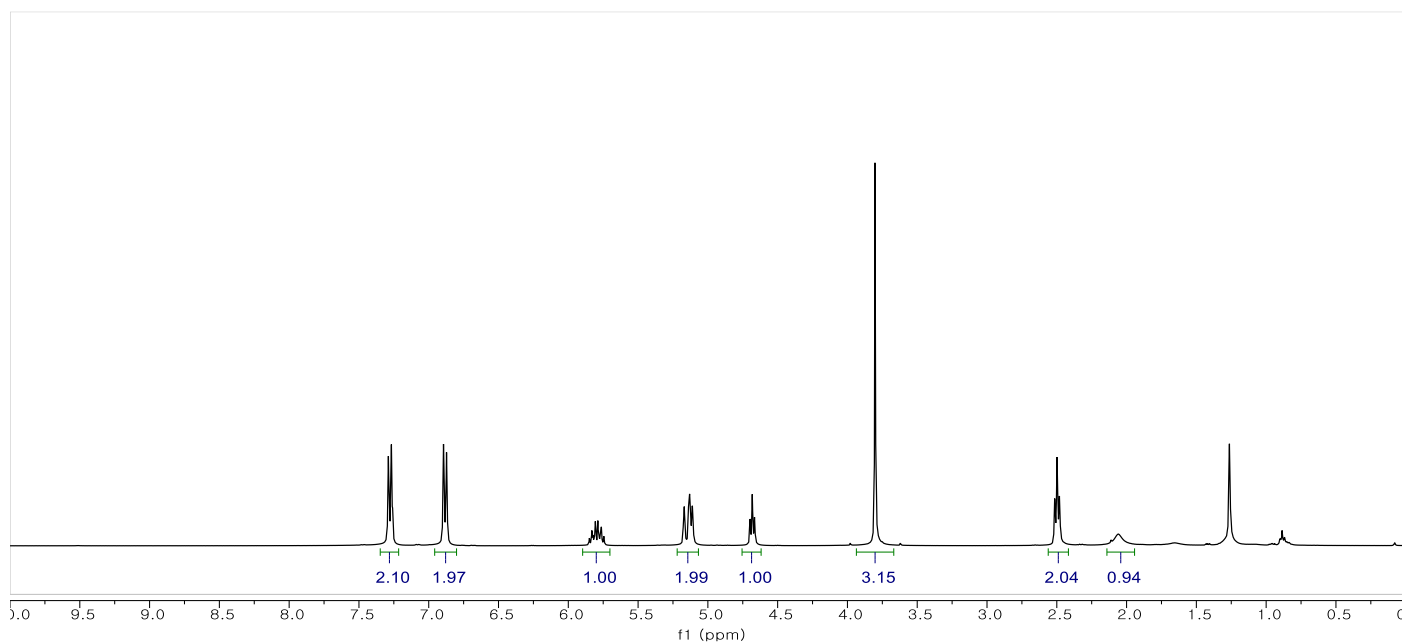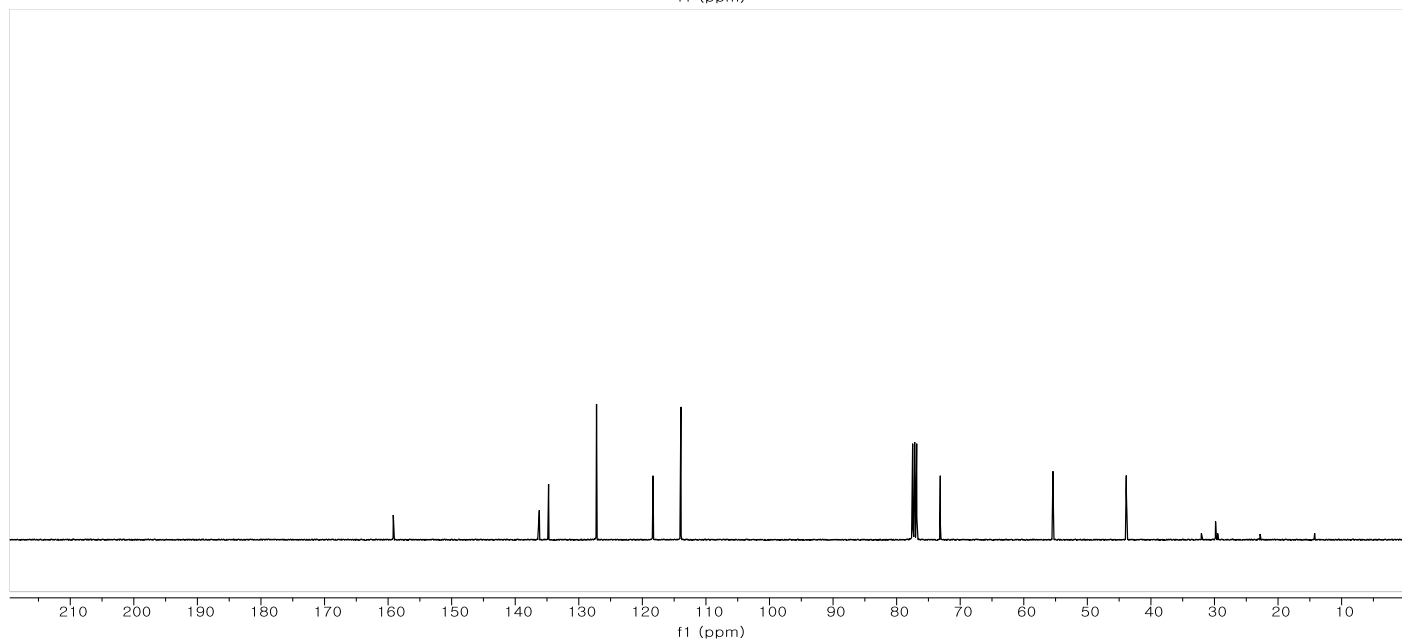

<sup>1</sup>H NMR (400 MHz, Chloroform-*d*)  $\delta$  7.35 – 7.22 (m, 2H), 6.96 – 6.80 (m, 2H), 5.80 (m, *J* = 17.2, 10.3, 7.1 Hz, 1H), 5.22 – 5.07 (m, 2H), 4.68 (t, *J* = 6.5 Hz, 1H), 3.80 (s, 3H), 2.50 (t, *J* = 6.9 Hz, 2H), 2.11 (s, 1H).

<sup>13</sup>C NMR (101 MHz, Chloroform-*d*)  $\delta$  159.2, 136.2, 134.8, 127.2, 118.3, 113.9, 73.1, 55.4, 43.9.

Following the general procedure A. Spectra were matched to a previous report.<sup>3</sup>

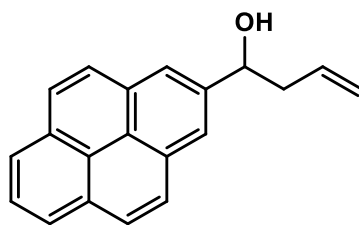

2f

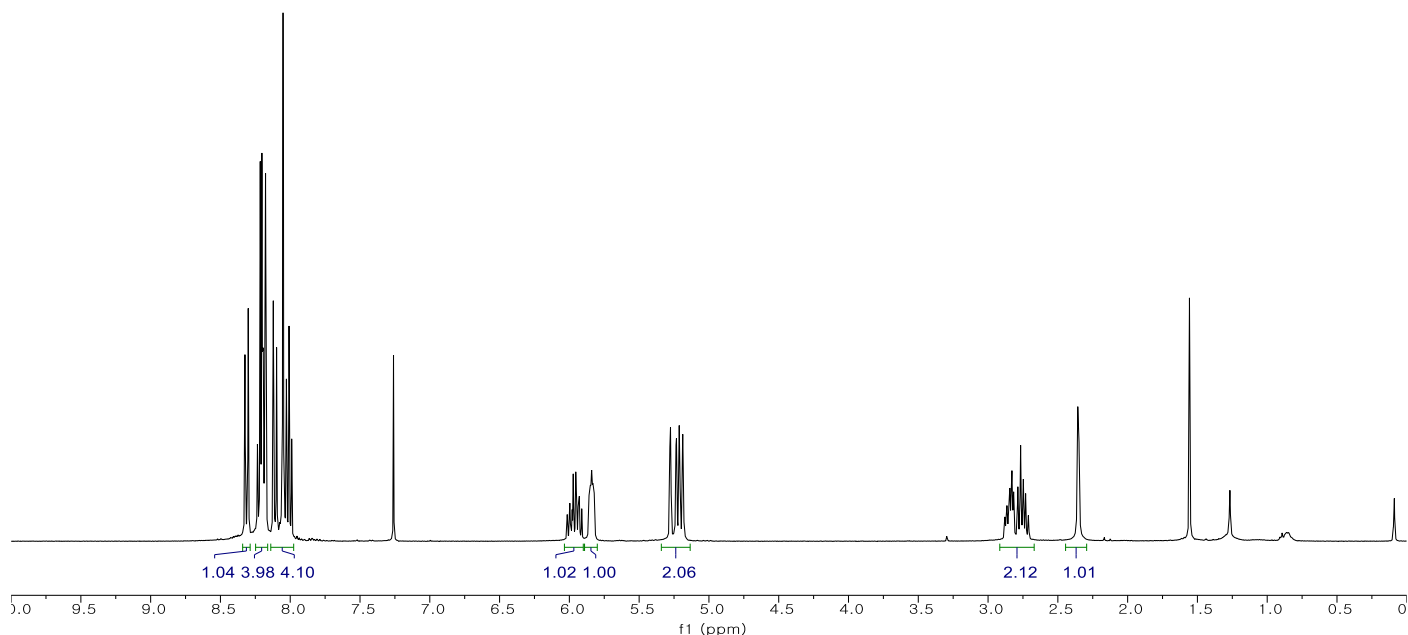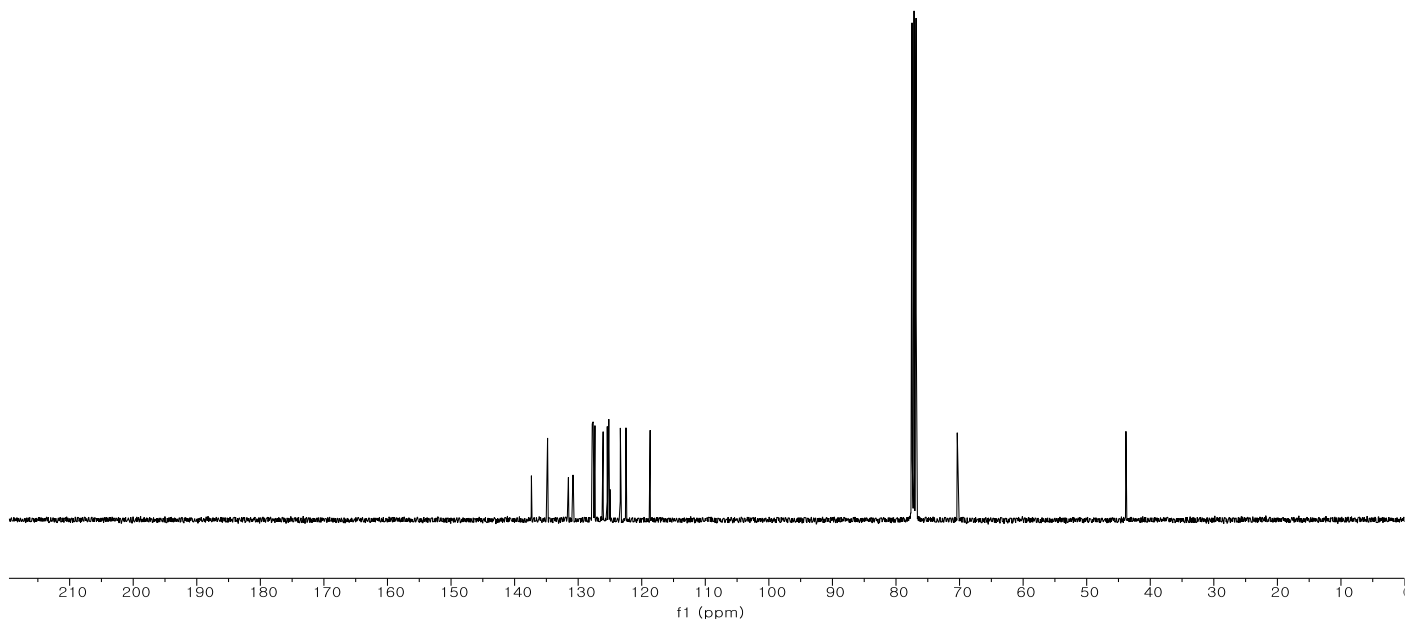

$^1\text{H}$  NMR (400 MHz, Chloroform-*d*)  $\delta$  8.31 (d,  $J = 9.3$  Hz, 1H), 8.25 – 8.16 (m, 4H), 8.14 – 7.98 (m, 4H), 6.04 – 5.90 (m, 1H), 5.84 (m,  $J = 7.6$ , 4.4, 2.3 Hz, 1H), 5.34 – 5.13 (m, 2H), 2.92 – 2.67 (m, 2H), 2.35 (d,  $J = 2.9$  Hz, 1H).

$^{13}\text{C}$  NMR (101 MHz, Chloroform-*d*)  $\delta$  137.4, 134.8, 131.5, 130.8, 130.8, 127.8, 127.6, 127.5, 127.4, 126.1, 125.4, 125.2, 125.2, 125.1, 125.0, 123.4, 122.5, 118.7, 70.4, 43.8.

HRMS (ESI)  $m/z$ :  $[\text{M}+\text{H}]^+$  + calcd. for  $\text{C}_{20}\text{H}_{16}\text{O}$  + 272.1201; found: 272.1198

Following the general procedure A.



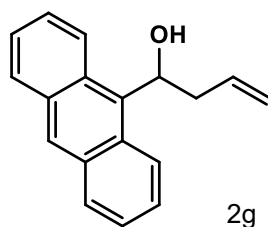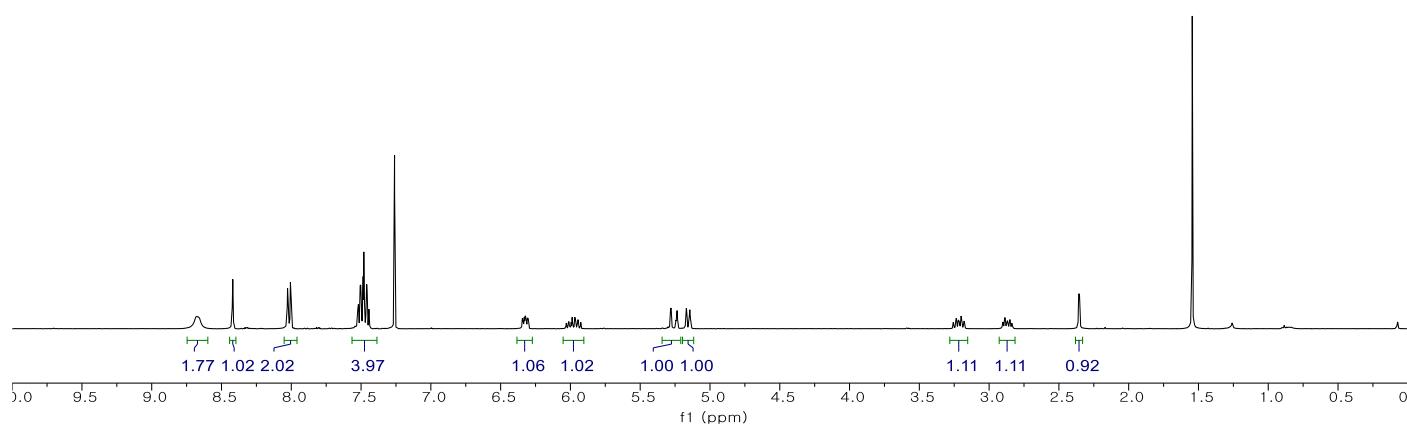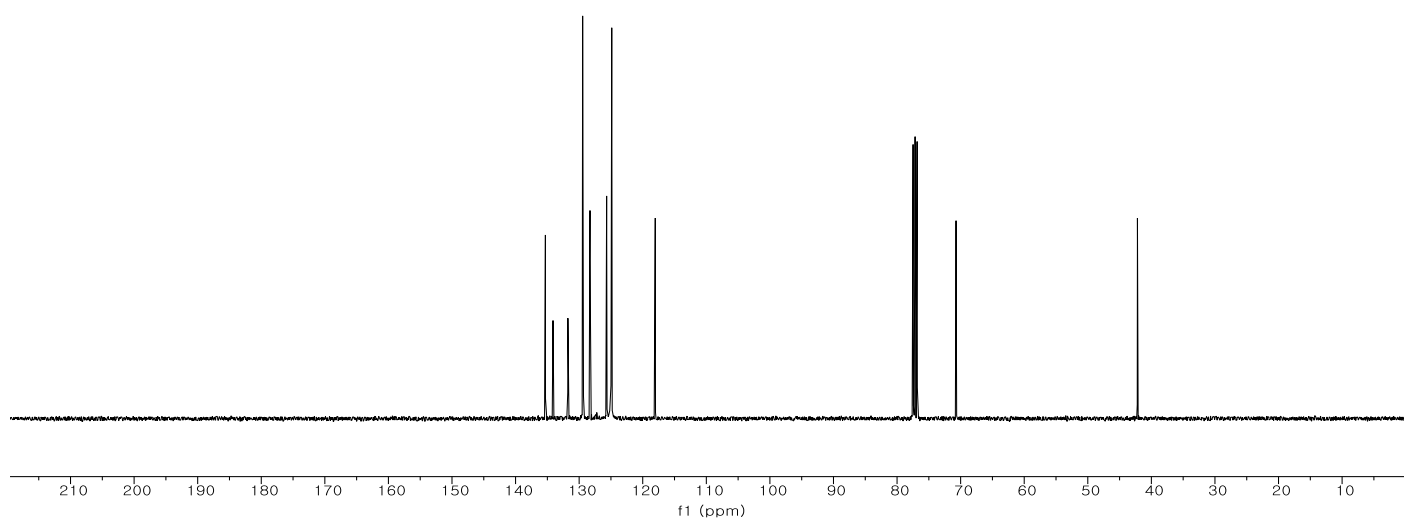

$^1\text{H}$  NMR (400 MHz, Chloroform- $d$ )  $\delta$  8.68 (s, 2H), 8.42 (s, 1H), 8.05 – 7.96 (m, 2H), 7.56 – 7.42 (m, 4H), 6.32 (m,  $J = 9.1, 5.3, 2.3$  Hz, 1H), 5.98 (m,  $J = 16.8, 10.1, 7.8, 6.4$  Hz, 1H), 5.26 (m,  $J = 17.1, 1.6$  Hz, 1H), 5.16 (m,  $J = 10.1, 2.0, 1.0$  Hz, 1H), 3.22 (m,  $J = 14.2, 9.0, 7.9, 1.1$  Hz, 1H), 2.93 – 2.81 (m, 1H), 2.36 (d,  $J = 2.4$  Hz, 1H).

$^{13}\text{C}$  NMR (101 MHz, Chloroform- $d$ )  $\delta$  135.3, 134.1, 131.8, 129.5, 129.3, 128.3, 125.7, 124.9, 118.0, 70.7, 42.2.

Following the general procedure A. Spectra were matched to a previous report.<sup>4</sup>

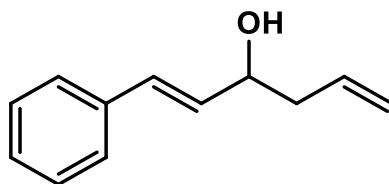

2h

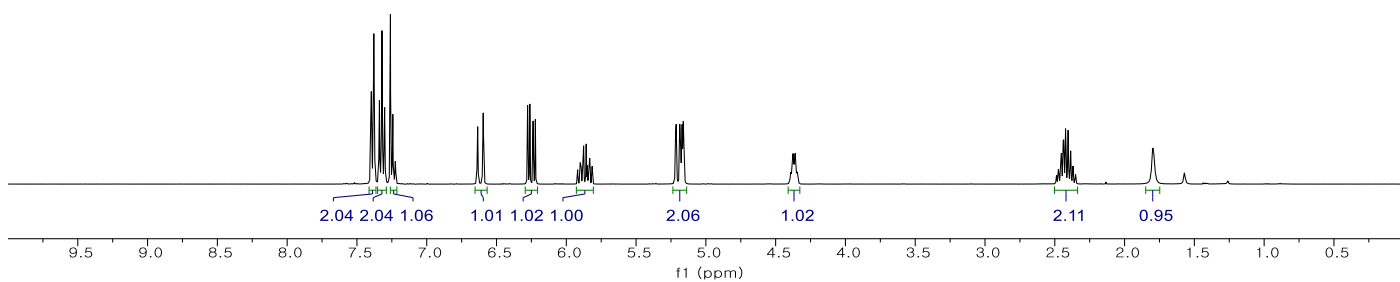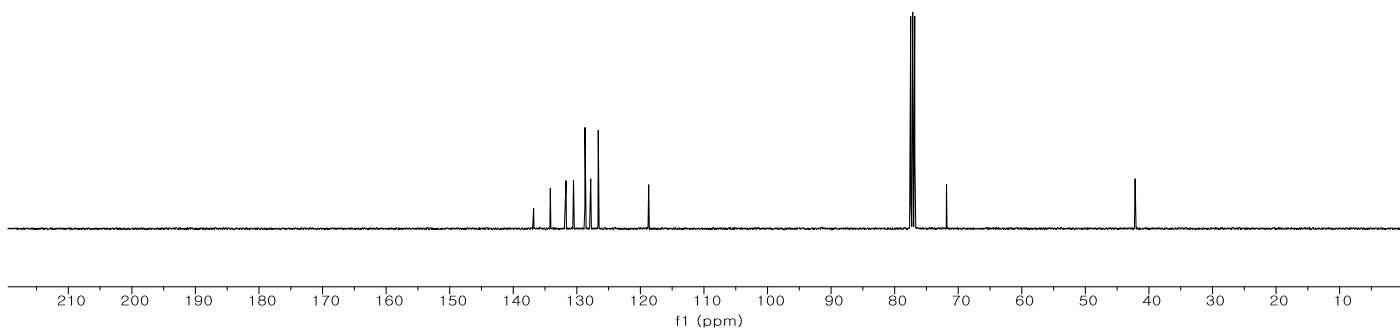

$^1\text{H}$  NMR (400 MHz, Chloroform-*d*)  $\delta$  7.41 – 7.36 (m, 2H), 7.35 – 7.29 (m, 2H), 7.26 – 7.21 (m, 1H), 6.62 (dd,  $J = 15.9, 1.3$  Hz, 1H), 6.25 (dd,  $J = 15.9, 6.3$  Hz, 1H), 5.93 – 5.81 (m, 1H), 5.24 – 5.14 (m, 2H), 4.37 (q,  $J = 6.3$  Hz, 1H), 2.50 – 2.34 (m, 2H), 1.80 (s, 1H).

$^{13}\text{C}$  NMR (101 MHz, Chloroform-*d*)  $\delta$  136.8, 134.2, 131.7, 130.5, 128.7, 127.8, 126.6, 118.7, 71.8, 42.2.

Following the general procedure A. Spectra were matched to a previous report.<sup>3</sup>

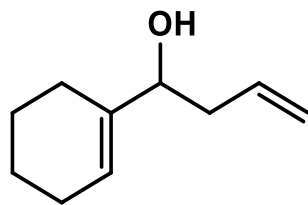

2i

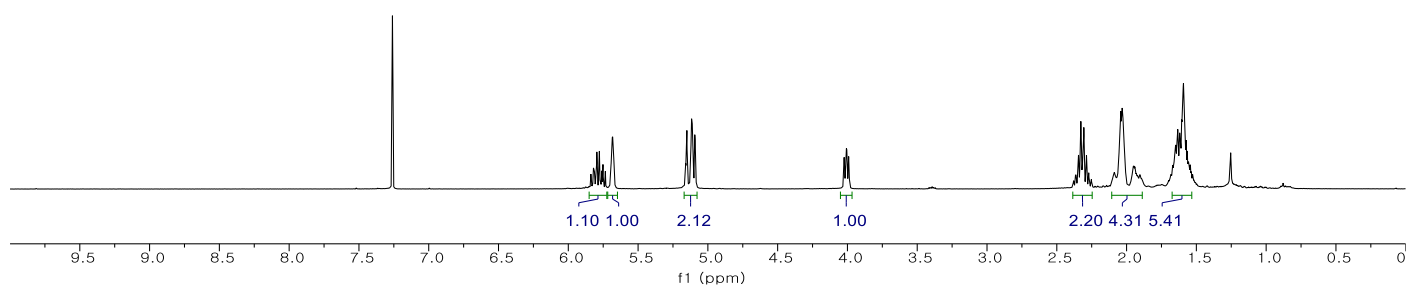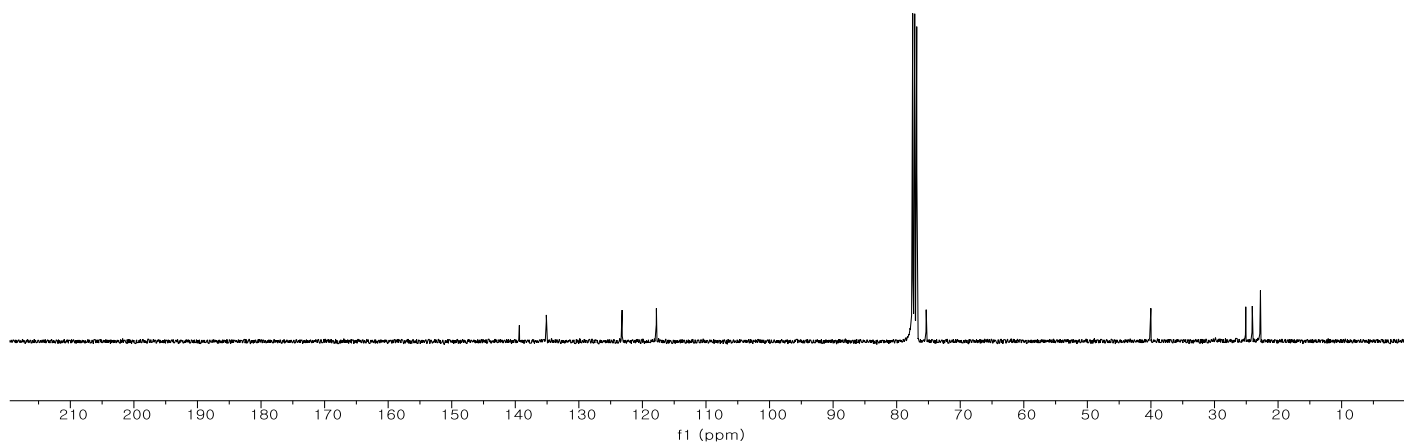

$^1\text{H}$  NMR (400 MHz, Chloroform-*d*)  $\delta$  5.79 (m,  $J = 17.2, 10.2, 7.1$  Hz, 1H), 5.69 (m,  $J = 4.6, 3.1, 2.2$  Hz, 1H), 5.17 – 5.08 (m, 2H), 4.01 (m,  $J = 7.6, 5.4$  Hz, 1H), 2.39 – 2.25 (m, 2H), 2.11 – 1.89 (m, 4H), 1.67 – 1.53 (m, 5H).

$^{13}\text{C}$  NMR (101 MHz, Chloroform-*d*)  $\delta$  139.4, 135.1, 123.2, 117.8, 75.4, 40.0, 25.1, 24.1, 22.8, 22.8.

Following the general procedure A. Spectra were matched to a previous report.<sup>3</sup>

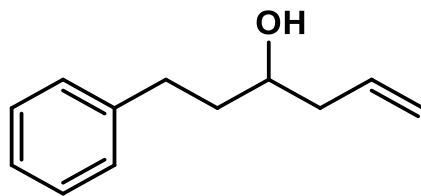

2j

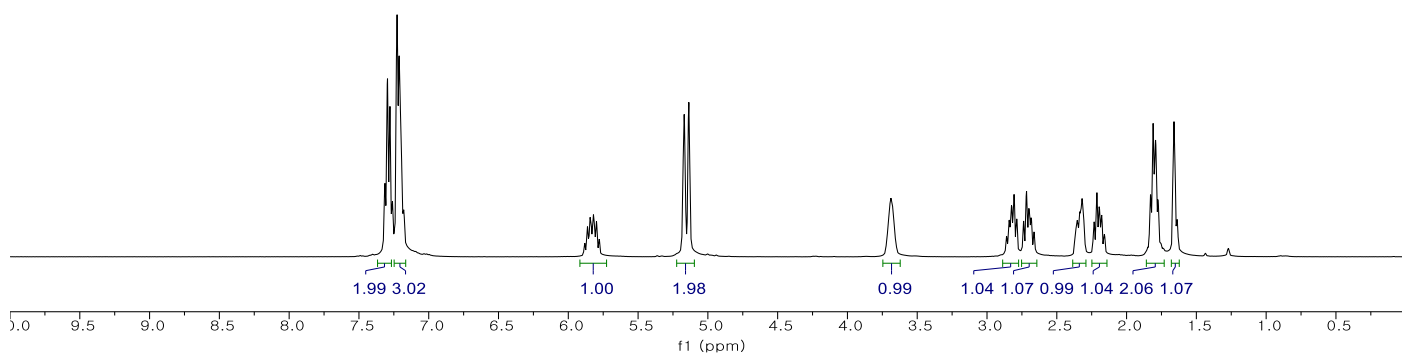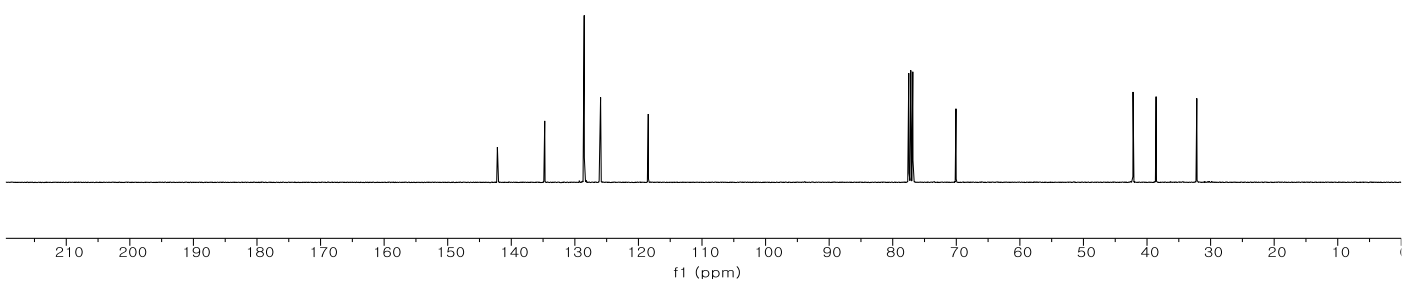

$^1\text{H}$  NMR (400 MHz, Chloroform-*d*)  $\delta$  7.37 – 7.27 (m, 2H), 7.20 (m,  $J = 9.6, 7.4$  Hz, 3H), 5.92 – 5.73 (m, 1H), 5.22 – 5.10 (m, 2H), 3.69 (m,  $J = 7.7, 4.0$  Hz, 1H), 2.82 (m,  $J = 14.3, 8.2, 7.4, 2.4$  Hz, 1H), 2.70 (m,  $J = 12.5, 8.2, 7.7, 2.5$  Hz, 1H), 2.39 – 2.29 (m, 1H), 2.25 – 2.14 (m, 1H), 1.80 (m,  $J = 9.0, 4.1, 2.1$  Hz, 2H), 1.65 (t,  $J = 4.6$  Hz, 1H).

$^{13}\text{C}$  NMR (101 MHz, Chloroform-*d*)  $\delta$  142.2, 134.7, 128.6, 128.5, 126.0, 118.5, 70.1, 42.2, 38.6, 32.2.

Following the general procedure A. Spectra were matched to a previous report.<sup>3</sup>

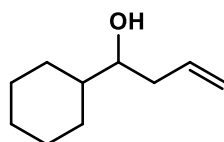

2k

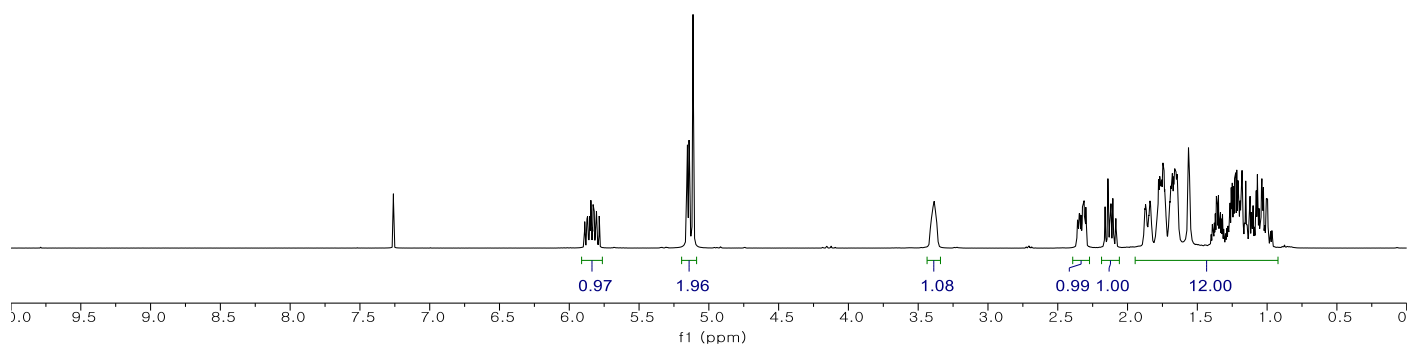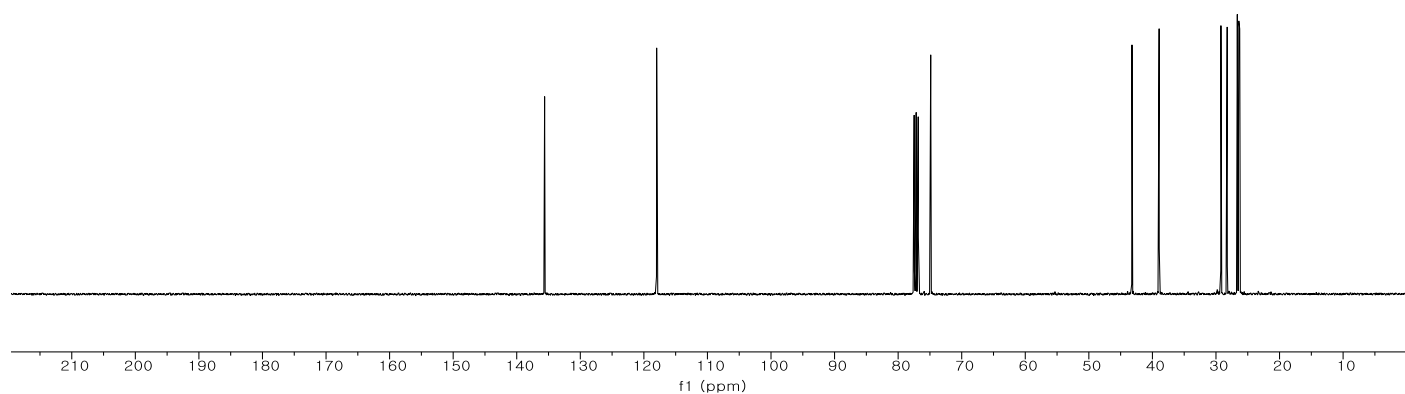

$^1\text{H}$  NMR (400 MHz, Chloroform-d)  $\delta$  5.91 – 5.76 (m, 1H), 5.20 – 5.09 (m, 2H), 3.39 (m,  $J$  = 8.8, 5.7, 2.7 Hz, 1H), 2.33 (m,  $J$  = 14.1, 6.4, 3.2, 1.5 Hz, 1H), 2.19 – 2.06 (m, 1H), 1.95 – 0.92 (m, 12H).

$^{13}\text{C}$  NMR (101 MHz, Chloroform-d)  $\delta$  135.6, 118.0, 74.9, 43.2, 38.9, 29.2, 28.2, 26.7, 26.4, 26.3.

Following the general procedure A. Spectra were matched to a previous report.<sup>2</sup>

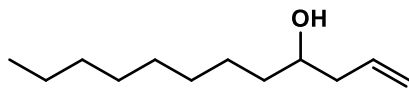

21

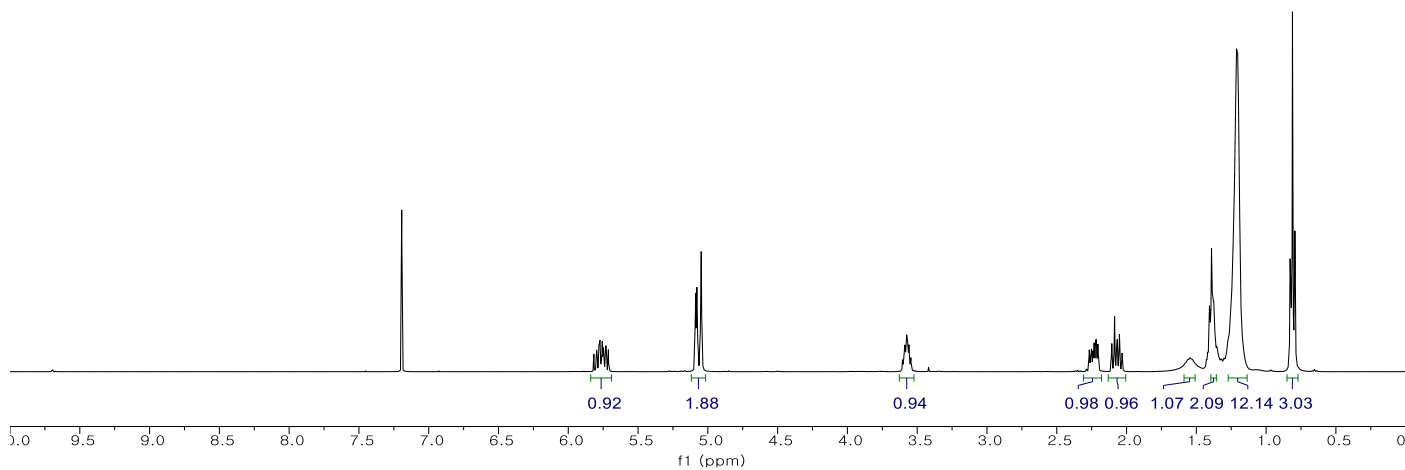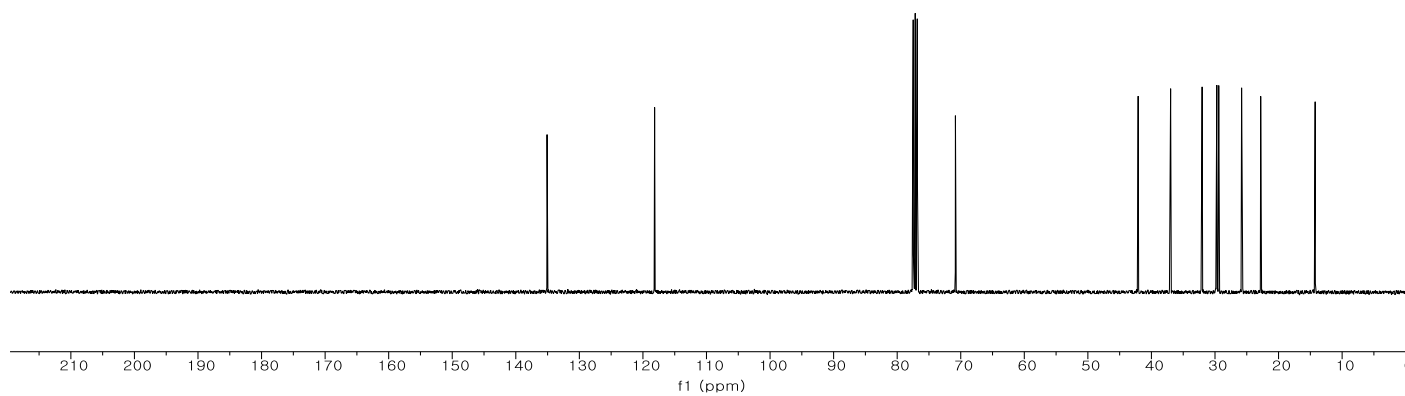

$^1\text{H}$  NMR (400 MHz, Chloroform-*d*)  $\delta$  5.91 – 5.76 (m, 1H), 5.18 – 5.08 (m, 2H), 3.64 (m,  $J = 7.8, 5.9, 4.1$  Hz, 1H), 2.38 – 2.25 (m, 1H), 2.20 – 2.07 (m, 1H), 1.62 (m,  $J = 9.7$  Hz, 1H), 1.45 (m,  $J = 6.9$  Hz, 2H), 1.28 (m,  $J = 4.8$  Hz, 12H), 0.92 – 0.84 (m, 3H).

$^{13}\text{C}$  NMR (101 MHz, Chloroform-*d*)  $\delta$  135.1, 118.2, 70.8, 42.1, 37.0, 32.0, 29.8, 29.7, 29.4, 25.8, 22.8, 14.2.

Following the general procedure A. Spectra were matched to a previous report.<sup>5</sup>

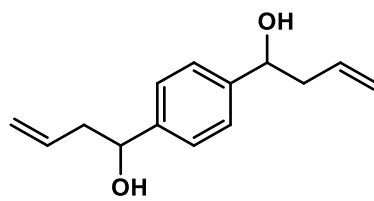

2m

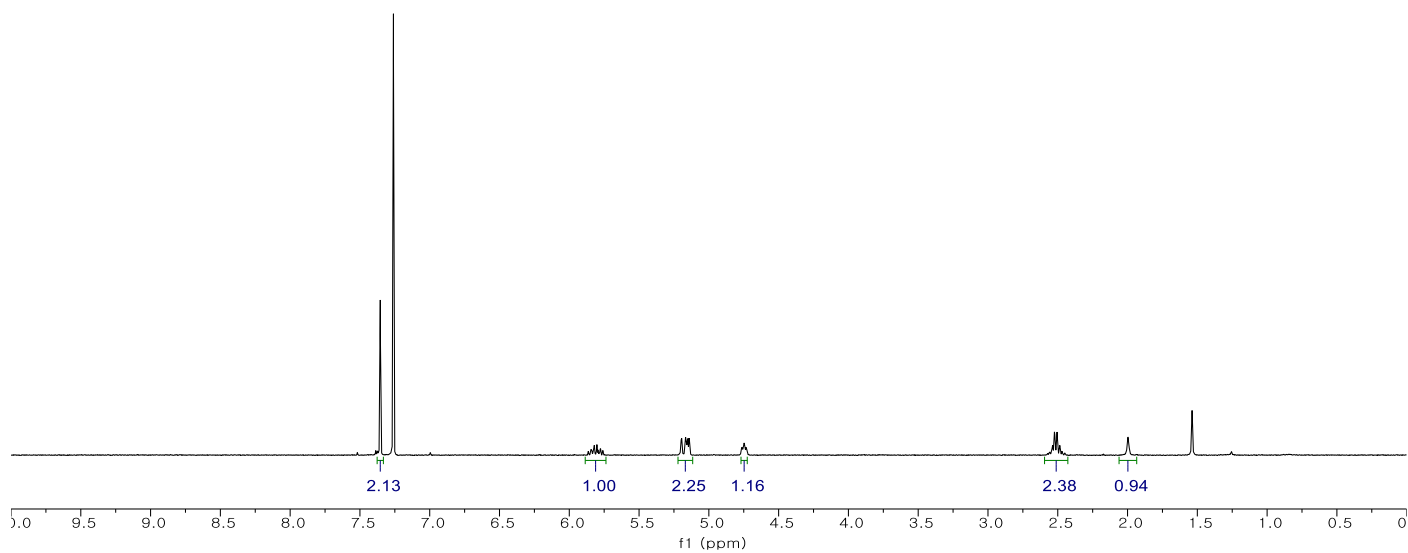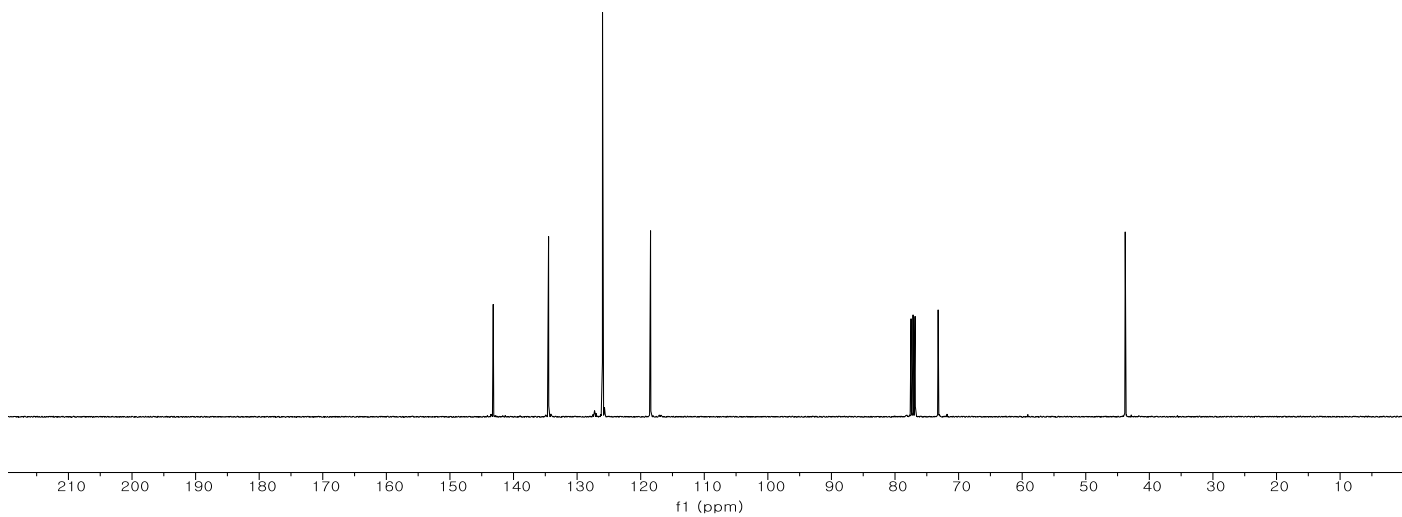

**<sup>1</sup>H NMR (400 MHz, Chloroform-d)  $\delta$  7.35 (s, 2H), 5.81 (m,  $J = 17.2, 10.1, 7.1$  Hz, 1H), 5.22 – 5.12 (m, 2H), 4.75 (t, 1H), 2.59 – 2.43 (m, 2H), 2.00 (s, 1H).**

**<sup>13</sup>C NMR (101 MHz, Chloroform-d)  $\delta$  143.2, 134.5, 126.0, 118.5, 73.2, 43.8.**

Following the general procedure A. Spectra were matched to a previous report.<sup>5</sup>

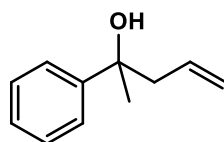

2n

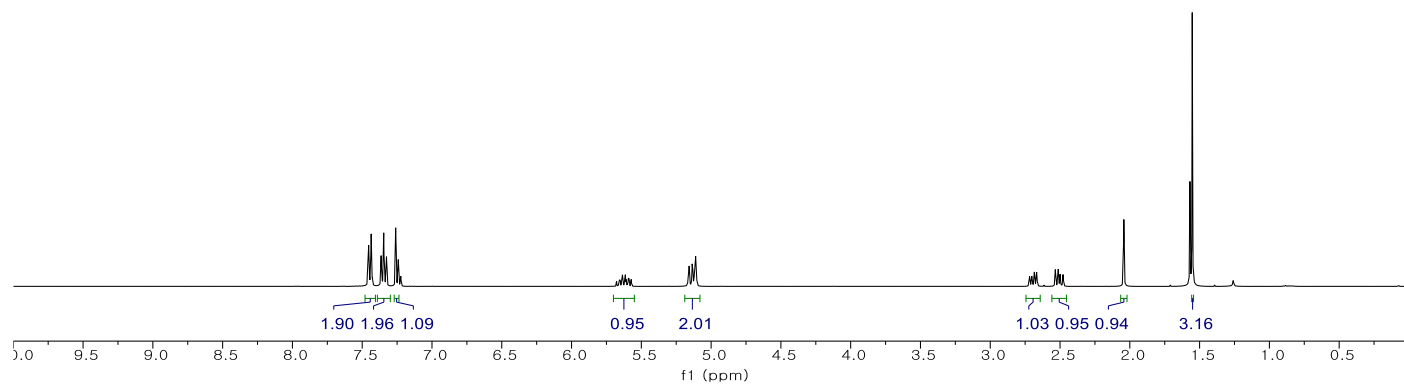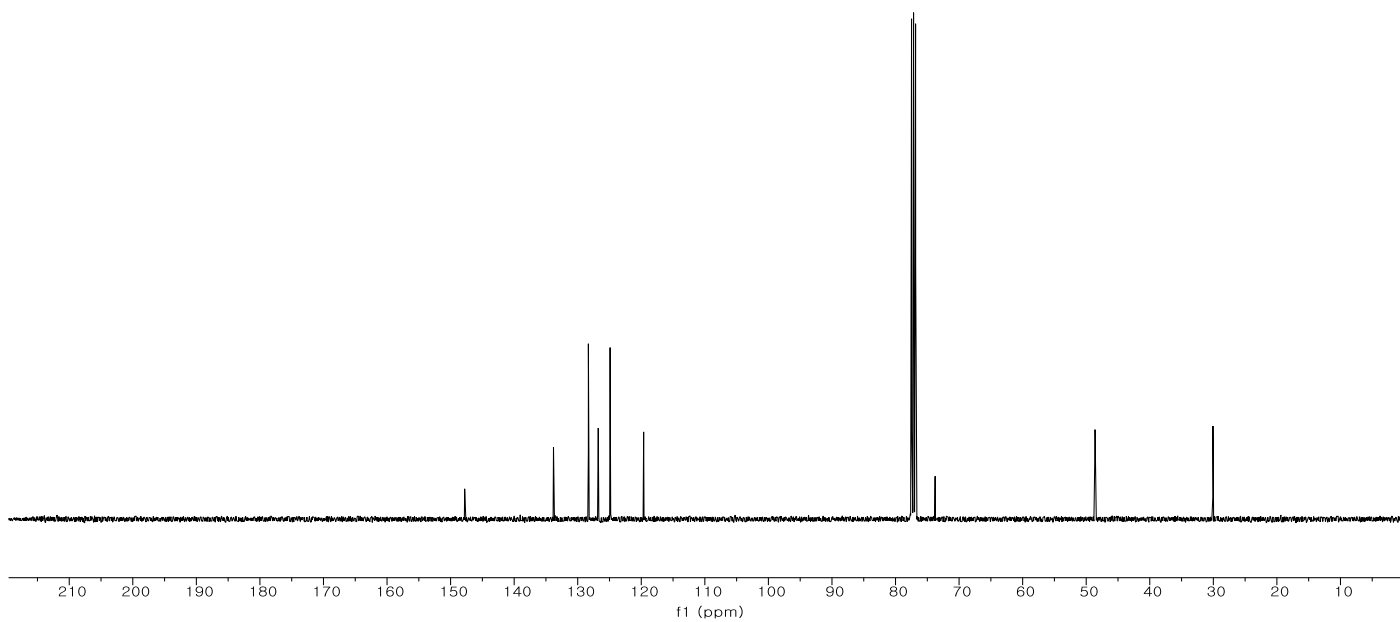

$^1\text{H}$  NMR (400 MHz, Chloroform-d)  $\delta$  7.48 – 7.41 (m, 2H), 7.34 (m,  $J$  = 8.5, 6.9 Hz, 2H), 7.26 – 7.23 (m, 1H), 5.62 (m,  $J$  = 16.8, 10.1, 8.3, 6.4 Hz, 1H), 5.19 – 5.08 (m, 2H), 2.69 (m,  $J$  = 13.8, 6.4, 1.3 Hz, 1H), 2.51 (m,  $J$  = 13.7, 8.3, 1.0 Hz, 1H), 2.04 (s, 1H), 1.55 (s, 3H).

$^{13}\text{C}$  NMR (101 MHz, Chloroform-d)  $\delta$  147.8, 133.8, 128.3, 126.8, 124.9, 119.6, 73.8, 48.6, 30.1.

Following the general procedure A. Spectra were matched to a previous report.<sup>2</sup>



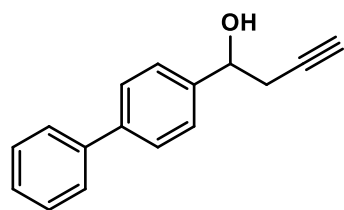

3a

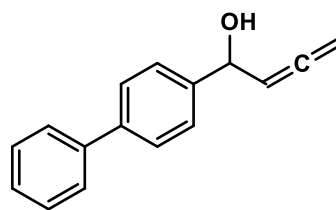

4a

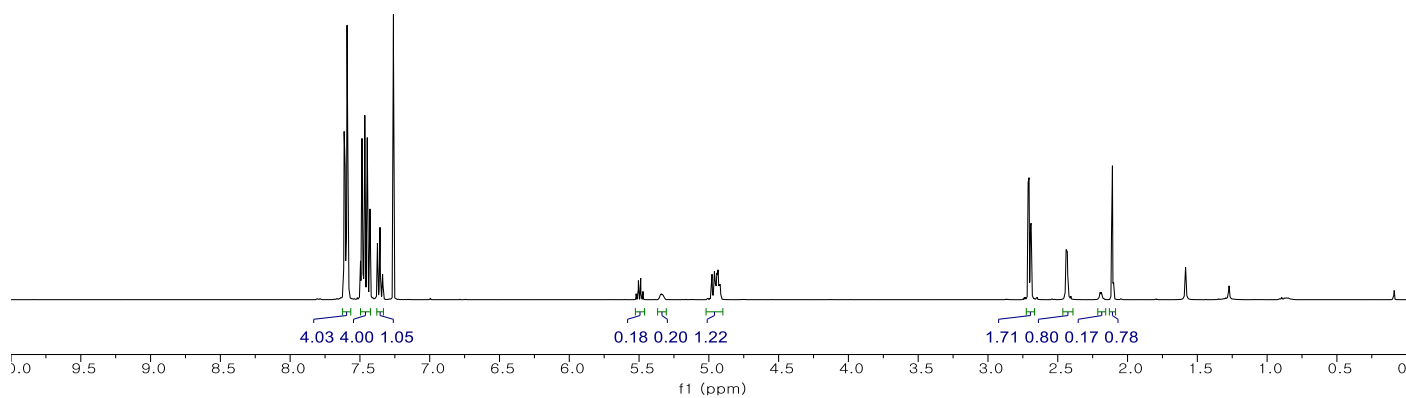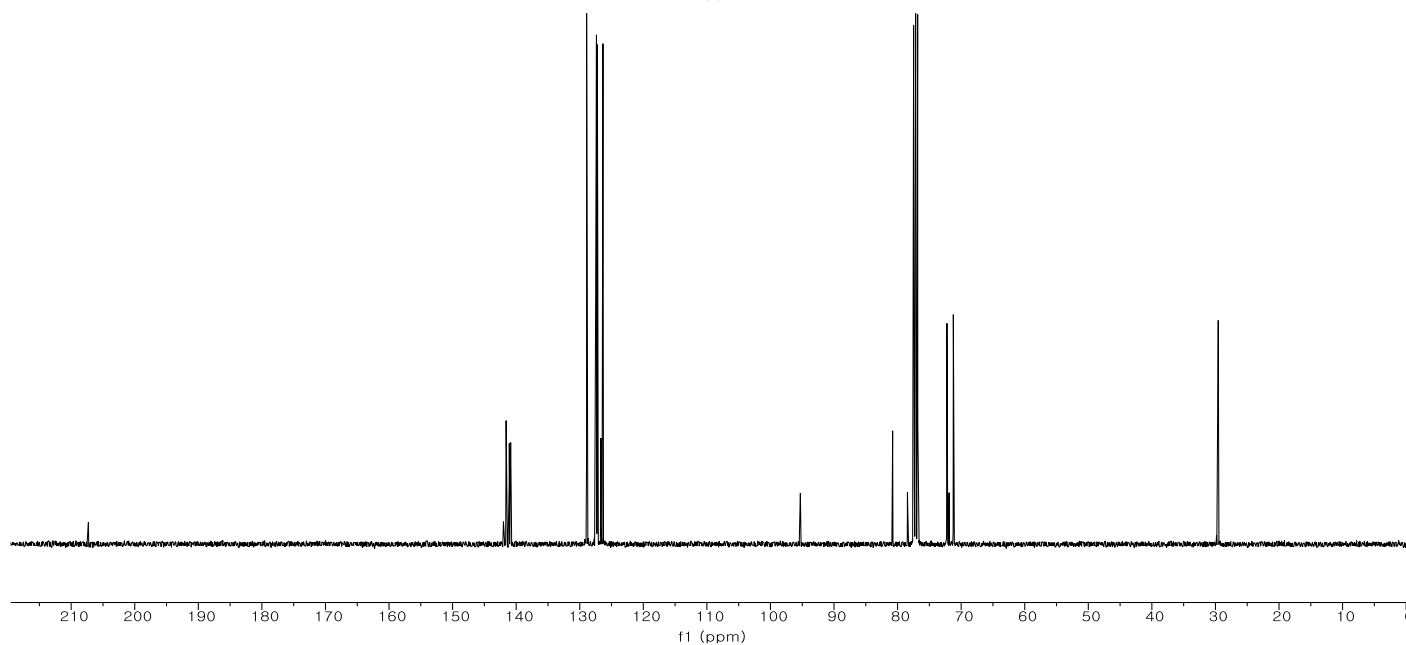

3a

$^1\text{H}$  NMR (400 MHz, Chloroform- $d$ )  $\delta$  7.66 – 7.56 (m, 4H), 7.52 – 7.40 (m, 4H), 7.40 – 7.32 (m, 1H), 4.94 (m,  $J$  = 6.0, 2.5 Hz, 1H), 2.76 – 2.64 (m, 2H), 2.44 (m,  $J$  = 3.4 Hz, 1H), 2.11 (t,  $J$  = 2.6 Hz, 1H).

$^{13}\text{C}$  NMR (101 MHz, Chloroform- $d$ )  $\delta$  141.6, 141.1, 140.9, 128.9, 127.5, 127.4, 127.2, 126.6, 80.8, 72.2, 71.2, 29.6.

4a

$^1\text{H}$  NMR (400 MHz, Chloroform- $d$ )  $\delta$  7.66 – 7.56 (m, 4H), 7.52 – 7.40 (m, 4H), 7.40 – 7.32 (m, 1H), 5.49 (q,  $J$  = 6.5 Hz, 1H), 5.37 – 5.29 (m, 1H), 5.02 – 4.96 (m, 2H), 2.19 (d,  $J$  = 4.0 Hz, 1H).

$^{13}\text{C}$  NMR (101 MHz, Chloroform- $d$ )  $\delta$  207.3, 142.0, 140.9 (d,  $J$  = 1.7 Hz), 128.9, 127.5, 127.4, 127.2, 126.7, 95.3, 78.5, 77.4, 71.9, 29.8.

Following the general procedure B. Spectra were matched to a previous report.<sup>6,7</sup>

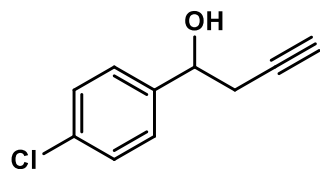

3b

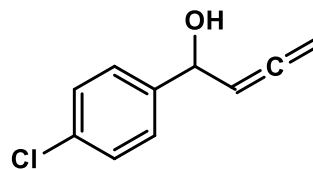

4b

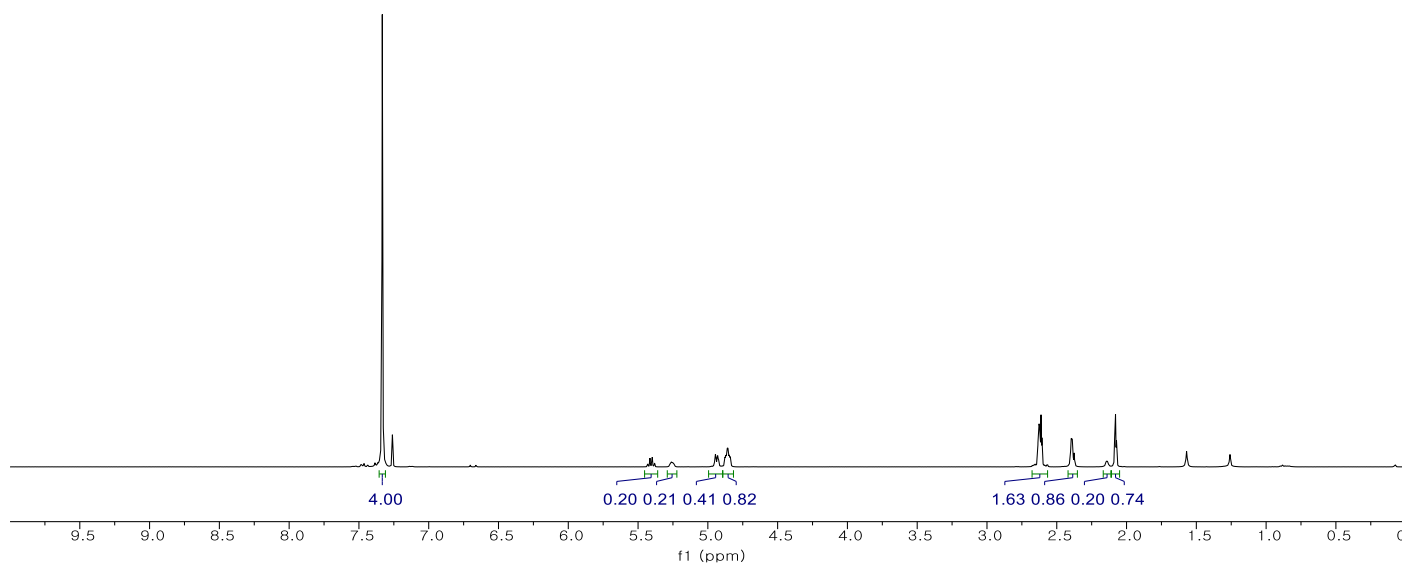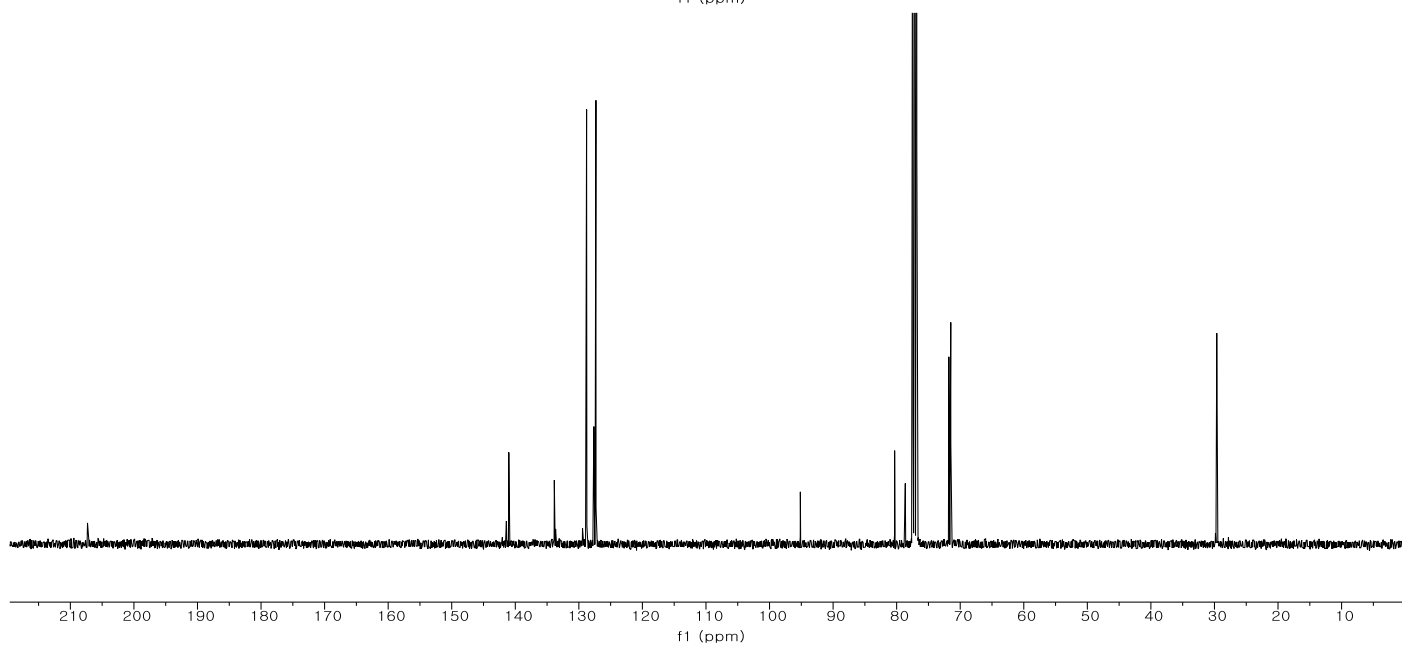

3b

$^1\text{H}$  NMR (400 MHz, Chloroform- $d$ )  $\delta$  7.33 (s, 4H), 4.86 (m,  $J$  = 6.3, 2.8 Hz, 1H), 2.68 – 2.57 (m, 2H), 2.42 – 2.35 (m, 1H), 2.08 (t,  $J$  = 2.6 Hz, 1H).

$^{13}\text{C}$  NMR (101 MHz, Chloroform- $d$ )  $\delta$  141.0, 133.9, 128.8, 127.3, 80.3, 71.8, 71.5, 29.6.

4b

$^1\text{H}$  NMR (400 MHz, Chloroform- $d$ )  $\delta$  7.33 (s, 4H), 5.41 (q,  $J$  = 6.5 Hz, 1H), 5.26 (dd,  $J$  = 6.4, 3.1 Hz, 1H), 5.00 – 4.91 (m, 2H), 2.14 (d,  $J$  = 3.9 Hz, 1H).

$^{13}\text{C}$  NMR (101 MHz, Chloroform- $d$ )  $\delta$  207.3, 141.4, 133.7, 128.8, 127.6, 95.2, 78.6, 71.5.

Following the general procedure B. Spectra were matched to a previous report.<sup>8,9</sup>

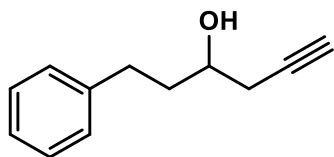

3c

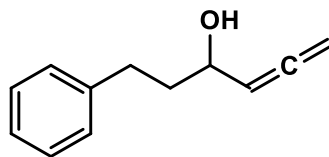

4c

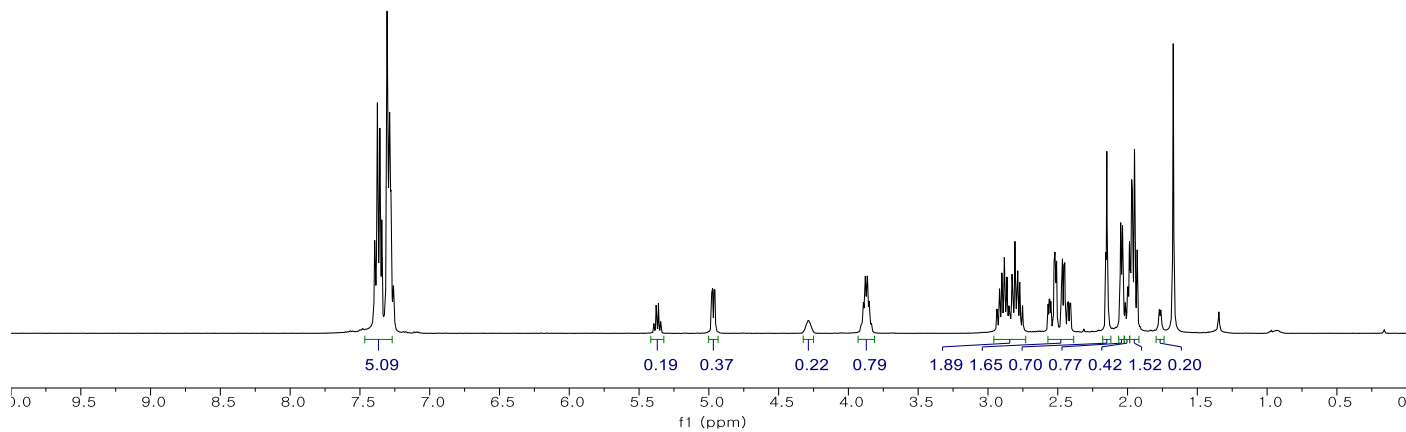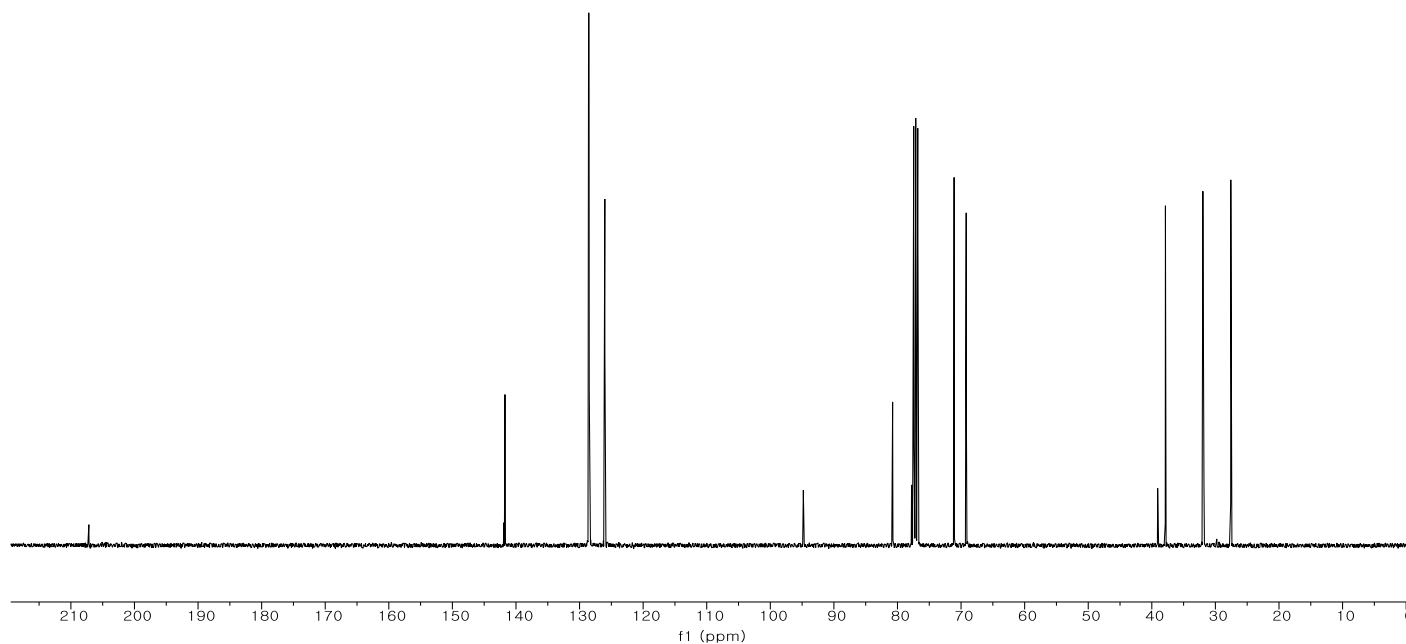

3c

$^1\text{H}$  NMR (400 MHz, Chloroform- $d$ )  $\delta$  7.42 – 7.26 (m, 5H), 3.93 – 3.81 (m, 1H), 2.91-2.73 (m, 2H), 2.59 – 2.39 (m, 2H), 2.15 (t,  $J$  = 2.7 Hz, 1H), 2.04 (d,  $J$  = 5.1 Hz, 1H), 1.97 – 1.92 (m, 2H).

$^{13}\text{C}$  NMR (101 MHz, Chloroform- $d$ )  $\delta$  141.7, 128.5, 128.5, 126.0, 80.8, 71.1, 69.2, 37.9, 32.0, 27.6.

4c

$^1\text{H}$  NMR (400 MHz, Chloroform- $d$ )  $\delta$  7.42 – 7.26 (m, 5H), 5.37 (q,  $J$  = 6.5 Hz, 1H), 4.97 (dd,  $J$  = 6.6, 2.4 Hz, 2H), 4.39 – 4.15 (m, 1H), 2.86 – 2.83 (m, 2H), 1.99 (m,  $J$  = 5.4 Hz, 2H), 1.77 (d,  $J$  = 4.8 Hz, 1H).

$^{13}\text{C}$  NMR (101 MHz, Chloroform- $d$ )  $\delta$  207.2, 141.9, 128.6, 128.5, 126.0, 94.8, 77.8, 69.0, 39.1, 31.8.

Following the general procedure B. Spectra were matched to a previous report.<sup>10</sup>

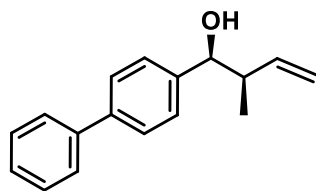

5a

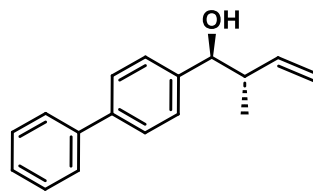

5'a

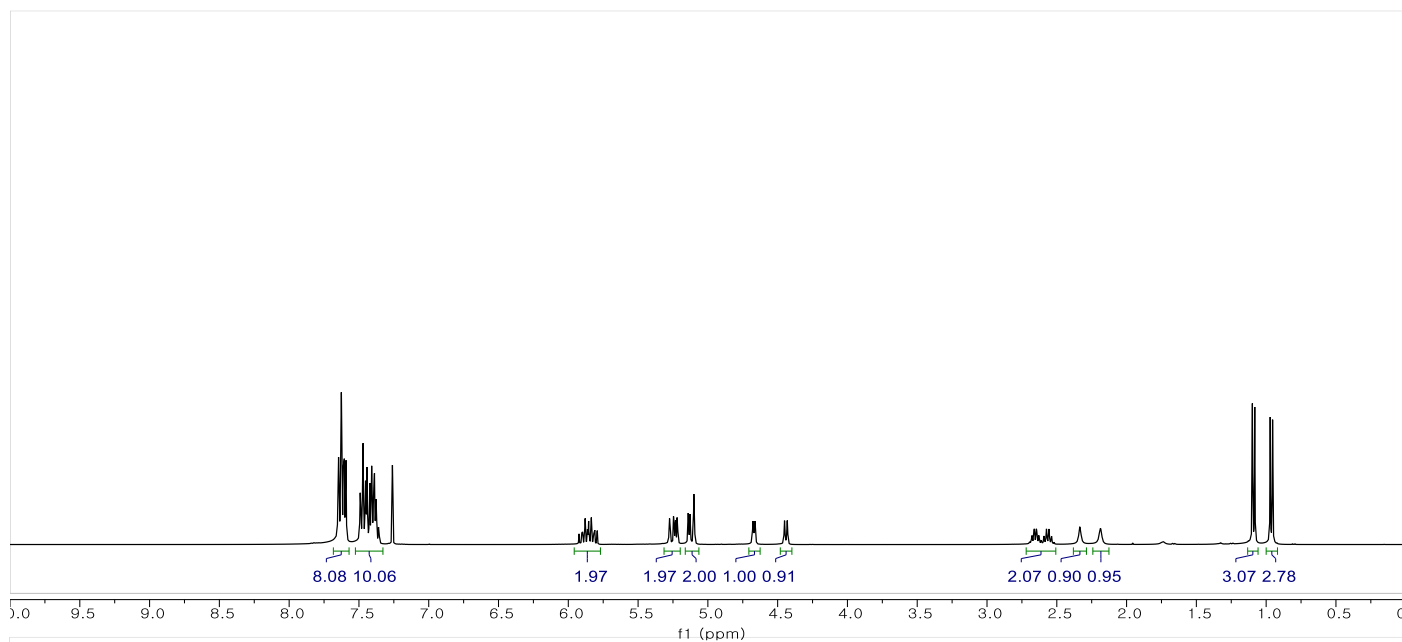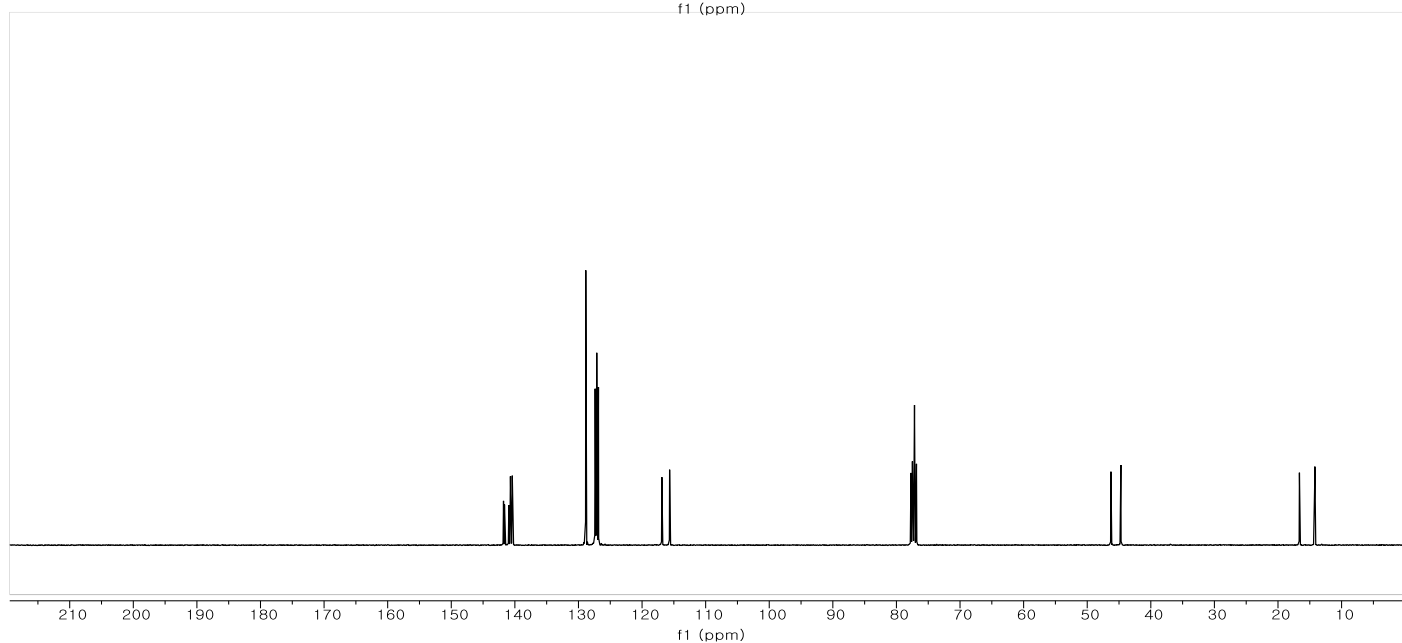

**5a**

$^1\text{H}$  NMR (400 MHz, Chloroform-*d*)  $\delta$  7.68 – 7.57 (m, 4H), 7.53 – 7.33 (m, 5H), 5.86 (m,  $J = 17.0, 10.1, 7.5$  Hz, 1H), 5.31 – 5.20 (m, 2H), 4.44 (d,  $J = 7.7$  Hz, 1H), 2.56 (m,  $J = 7.0$  Hz, 1H), 2.33 (s, 1H), 1.09 (d,  $J = 6.8$  Hz, 3H).

$^{13}\text{C}$  NMR (101 MHz, Chloroform-*d*)  $\delta$  141.6, 141.0, 140.7, 140.6, 140.4, 128.9, 127.4, 127.2, 127.1, 127.1, 127.0, 126.9, 116.9, 77.7, 46.3, 16.6.

**5'a**

$^1\text{H}$  NMR (400 MHz, Chloroform-*d*)  $\delta$  7.68 – 7.57 (m, 4H), 7.53 – 7.33 (m, 5H), 5.86 (m,  $J = 17.0, 10.1, 7.5$  Hz, 1H), 5.16 – 5.06 (m, 2H), 4.67 (d,  $J = 5.5$  Hz, 1H), 2.72 – 2.61 (m, 1H), 2.19 (s, 1H), 0.96 (d,  $J = 6.8$  Hz, 3H).

$^{13}\text{C}$  NMR (101 MHz, Chloroform-*d*)  $\delta$  141.8, 141.0, 140.4, 140.3, 128.9, 127.4, 127.2, 127.1, 127.1, 127.0, 126.9, 115.7, 77.4, 44.7, 14.2.

Following the general procedure C. Spectra were matched to a previous report.<sup>11</sup>

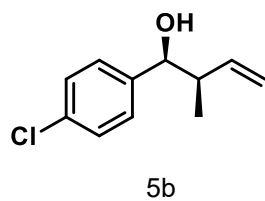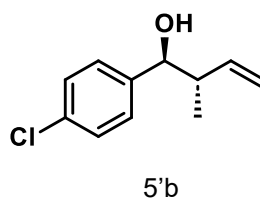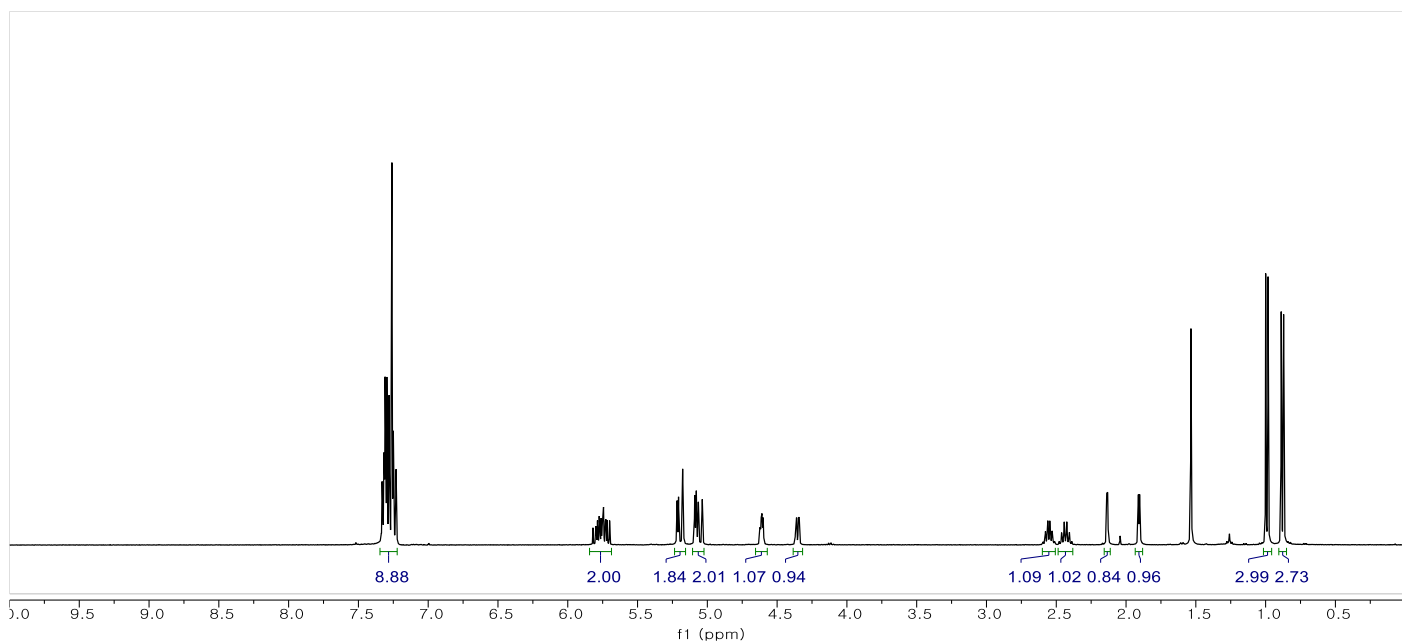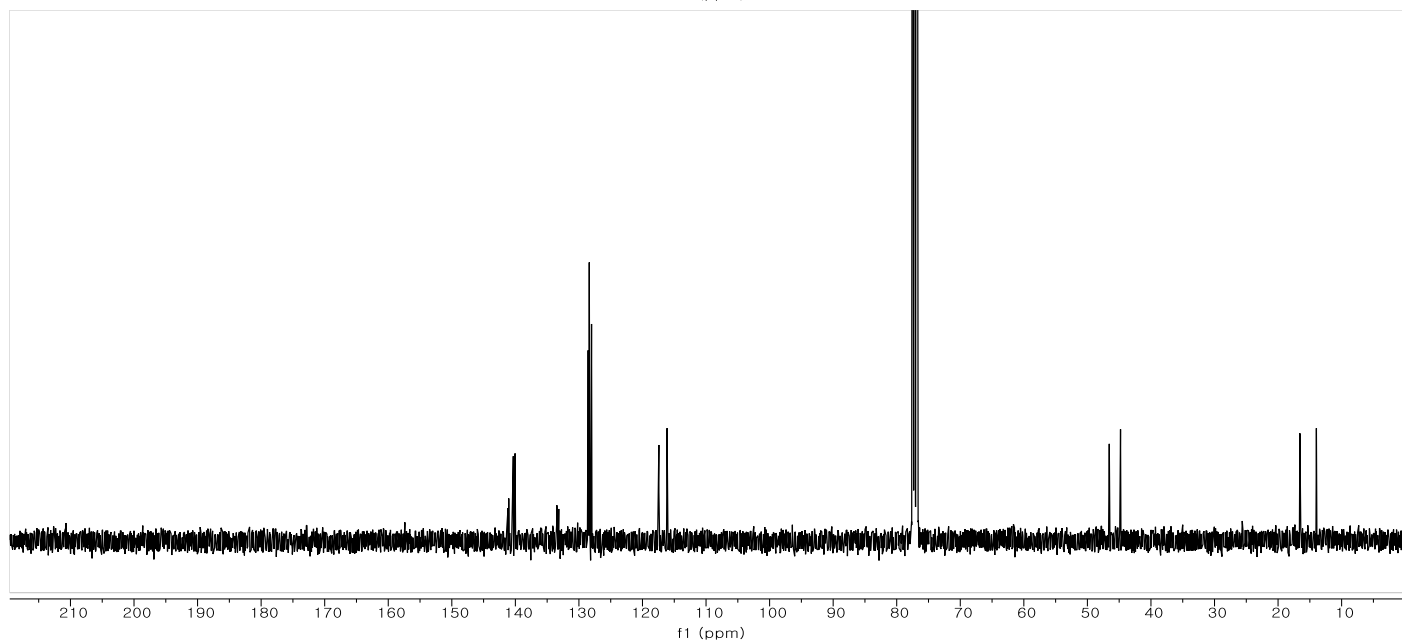

5b

$^1\text{H}$  NMR (400 MHz, Chloroform-*d*)  $\delta$  7.35 – 7.22 (m, 4H), 5.84 – 5.69 (m, 1H), 5.11 – 5.02 (m, 2H), 4.61 (dd,  $J$  = 5.4, 3.4 Hz, 1H), 2.55 (m,  $J$  = 6.9, 5.5, 1.3 Hz, 1H), 1.91 (d,  $J$  = 3.6 Hz, 1H), 0.99 (d,  $J$  = 6.8 Hz, 3H).

$^{13}\text{C}$  NMR (101 MHz, Chloroform-*d*)  $\delta$  141.2, 140.1, 133.2, 128.5, 128.4, 128.0, 116.1, 76.7, 44.8, 16.6.

5'b

$^1\text{H}$  NMR (400 MHz, Chloroform-*d*)  $\delta$  7.35 – 7.22 (m, 4H), 5.84 – 5.69 (m, 1H), 5.23 – 5.16 (m, 2H), 4.35 (dd,  $J$  = 7.8, 2.4 Hz, 1H), 2.49 – 2.38 (m, 1H), 2.13 (d,  $J$  = 2.7 Hz, 1H), 0.88 (d,  $J$  = 6.8 Hz, 3H).

$^{13}\text{C}$  NMR (101 MHz, Chloroform-*d*)  $\delta$  141.0, 140.3, 133.5, 128.5, 128.4, 128.0, 117.4, 77.3, 46.5, 14.0.

Following the general procedure C. Spectra were matched to a previous report.<sup>11</sup>

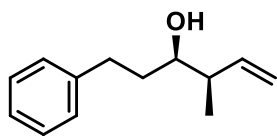

5c

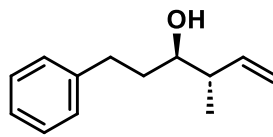

5'c

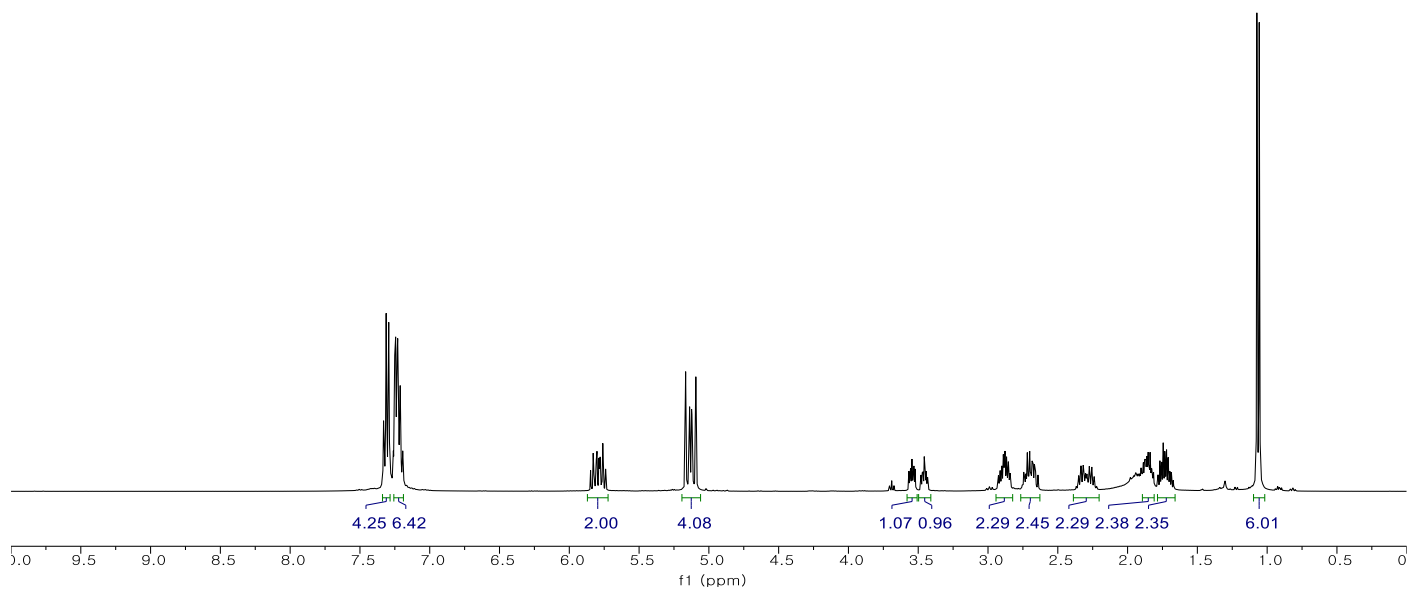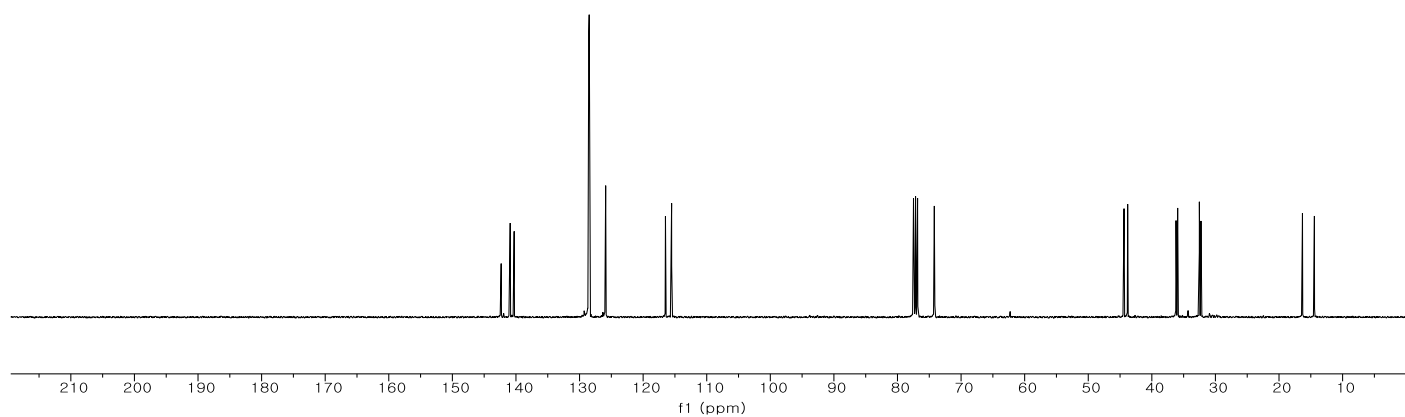

5c

$^1\text{H}$  NMR (400 MHz, Chloroform-*d*)  $\delta$  7.34 – 7.28 (m, 2H), 7.26 – 7.19 (m, 3H), 5.79 (m,  $J = 17.2, 11.3, 7.7$  Hz, 1H), 5.19 – 5.06 (m, 2H), 3.55 (m,  $J = 9.4, 5.2, 3.2$  Hz, 1H), 2.94 – 2.82 (m, 2H), 2.39 – 2.20 (m, 1H), 1.79 – 1.66 (m, 2H), 1.07 (d,  $J = 6.9$  Hz, 3H).

$^{13}\text{C}$  NMR (101 MHz, Chloroform-*d*)  $\delta$  142.3, 140.9, 128.6, 128.6, 128.5, 128.5, 125.9, 115.5, 74.2, 43.8, 35.9, 32.5, 14.4.

5'c

$^1\text{H}$  NMR (400 MHz, Chloroform-*d*)  $\delta$  7.34 – 7.28 (m, 2H), 7.26 – 7.19 (m, 3H), 5.79 (m,  $J = 17.2, 11.3, 7.7$  Hz, 1H), 5.19 – 5.06 (m, 2H), 3.46 (m,  $J = 9.1, 5.9, 3.3$  Hz, 1H), 2.69 (m,  $J = 13.8, 10.3, 6.7$  Hz, 2H), 2.39 – 2.20 (m, 1H), 1.85 (m,  $J = 10.0, 6.7, 5.4, 3.5$  Hz, 2H), 1.07 (d,  $J = 6.9$  Hz, 3H).

$^{13}\text{C}$  NMR (101 MHz, Chloroform-*d*)  $\delta$  142.3, 140.3, 128.6, 128.6, 128.5, 128.5, 125.9, 116.5, 74.2, 44.4, 36.2, 32.3, 16.3.

Following the general procedure C. Spectra were matched to a previous report.<sup>13</sup>

## Reference

1. Xu, C.; Fyfe, J. W. B.; Seath, C. P.; Bennett, S. H.; Watson, A. J. B. A One-pot Tandem Chemoselective Allylation/Cross-coupling via Temperature Control of a Multi-nucleophile/electrophile System. *Chem. Commun.* **2017**, *53*, 9139–9142.
2. Yin, J. X.; Stark, R. T.; Fallis, I. A.; Browne, D. L. A Mechanochemical Zinc-Mediated Barbier-Type Allylation Reaction under Ball-Milling Conditions. *J. Org. Chem.* **2020**, *85*, 2347–2354
3. Denmark, S. E.; Nguyen, S. T. Catalytic, Nucleophilic Allylation of Aldehydes with Allyl Acetate. *Org. Lett.* **2009**, *11*, 781–784
4. M. D. Preite, H. A. Jorquera-Geroldi and A. Pérez-Carvajal, Barbier allylation of aldehydes and ketones with aluminium and catalytic indium metal: an economical alternative, *ARKIVOC*, **2011**, *7*, 380
5. Lin, M.-H.; Lin, L.-Z.; Chuang, T.-H.; Liu, H.-J. One-pot sequential deoximation and allylation reactions of aldoximes in aqueous solution. *Tetrahedron* **2012**, *68*, 2630–2635
6. Li, Y.; Brand, J. P.; Waser, J. Gold-Catalyzed Regioselective Synthesis of 2- and 3-Alkynyl Furans. *Angew. Chem., Int. Ed.* **2013**, *52*, 6743–6747
7. Petrone, D. A.; Isomura, M.; Franzoni, I.; Rössler, S. L.; Carreira, E. M. Allenylic Carbonates in Enantioselective Iridium-Catalyzed Alkylations. *J. Am. Chem. Soc.* **2018**, *140*, 4697–4704
8. Jain, P.; Wang, H.; Houk, K. N.; Antilla, J. C. Brønsted Acid Catalyzed Asymmetric Propargylation of Aldehydes. *Angew. Chem., Int. Ed.* **2012**, *51*, 1391–1394
9. Luo, H.; Ma, S. CuI-Catalyzed Synthesis of Functionalized Terminal Allenes from 1-Alkynes. *Eur. J. Org. Chem.* **2013**, *2013*, 3041–3048
10. Schneider, U., Sugiura, M., & Kobayashi, S. Highly selective formation of propargyl- and allenyltrichlorosilanes and their regiospecific addition to various types of aldehydes: preparation of both allenic and homopropargylic alcohols. *Tetrahedron* **2006**, *62*(2-3), 496-502.
11. Bandini, M., Cozzi, P. G., & Umani-Ronchi, A.; Enantioselective catalytic addition of allyl organometallic reagents to aldehydes promoted by [Cr (Salen)]: the hidden role played by weak Lewis acids in metallo-Salen promoted reactions. *Tetrahedron* **2001**, *57*, 835-843.
12. Taylor, R. E.; Engelhardt, F. C.; Schmitt, M. J.; Yuan, H. Synthetic Methodology for the Construction of Structurally Diverse Cyclopropanes. *J. Am. Chem. Soc.* **2001**, *123*, 2964–2969
